# Supplementary material for: A crotonyl-CoA reductase-carboxylase independent pathway for assembly of unusual alkylmalonyl-CoA polyketide synthase extender units
Source: PubMed Central journal article supplement (PMC5187497; doi:10.1038/ncomms13609), 2016-12-21
Supplement: ncomms13609-s1.pdf [file ncomms13609-s1.pdf]

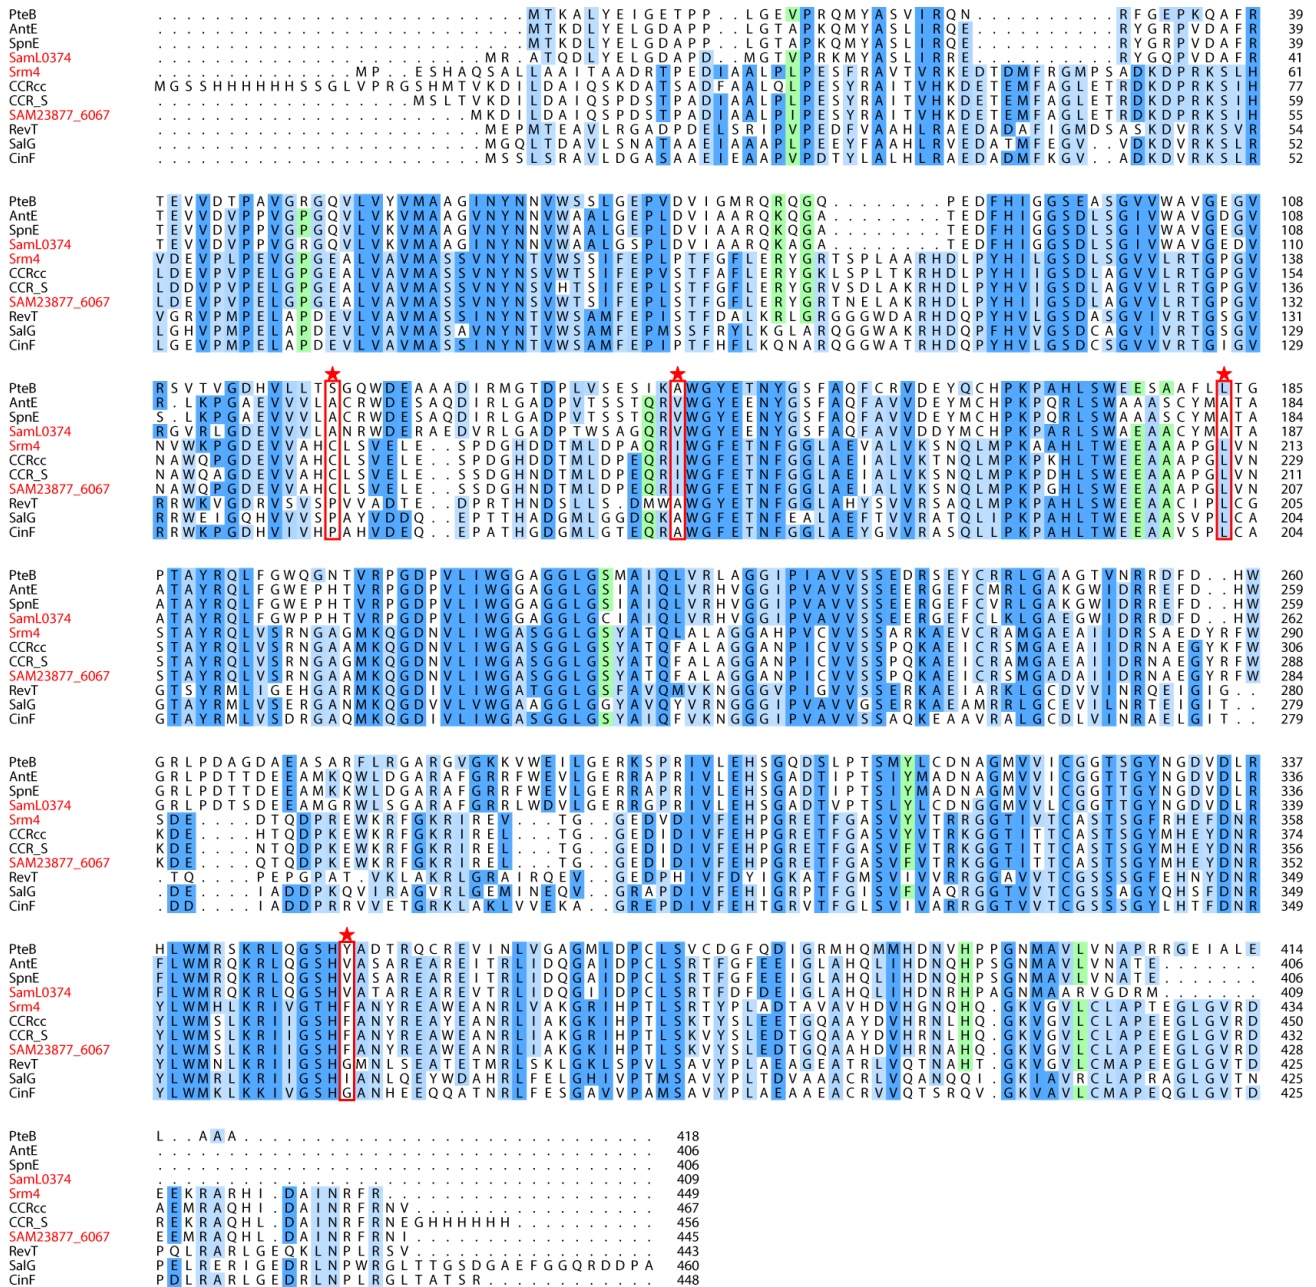

**Supplementary Figure 1: Sequence alignment of CCRC homologues identified in *Streptomyces ambofaciens* ATCC23877 with well characterized CCRCs.** The residues highlighted by the stars and red boxes are essential in defining the substrate specificity of CCRCs.<sup>1-3</sup> The specificity-conferring residues in the CCRC homologues in *S. ambofaciens* ATCC23877 do not resemble those of RevT, PteB, and CinF, all of which are known to be responsible for the biosynthesis of longer alkylmalonyl-CoA extender units. The sequence names highlighted in red are those from *S. ambofaciens* ATCC23877. The sequences designated CCRc and CCR\_S are both specific for crotonyl-CoA and the three CCRC homologues in *S. ambofaciens* have very similar specificity-conferring residues to these enzymes. Accession numbers: CCRc, 3HZZ; CCR\_S, 3KRT; AntE, AGG37751;

SpnE, AKA54628; PteB, WP\_010981851; SalG, ABP73651; RevT, BAK64636; CinF, CBW54676; SamL0374 (SAM23877\_0426), AKZ53475; Srm4\*c (SAM23877\_5633), AKZ58678; SAM23877\_6076, AK59112

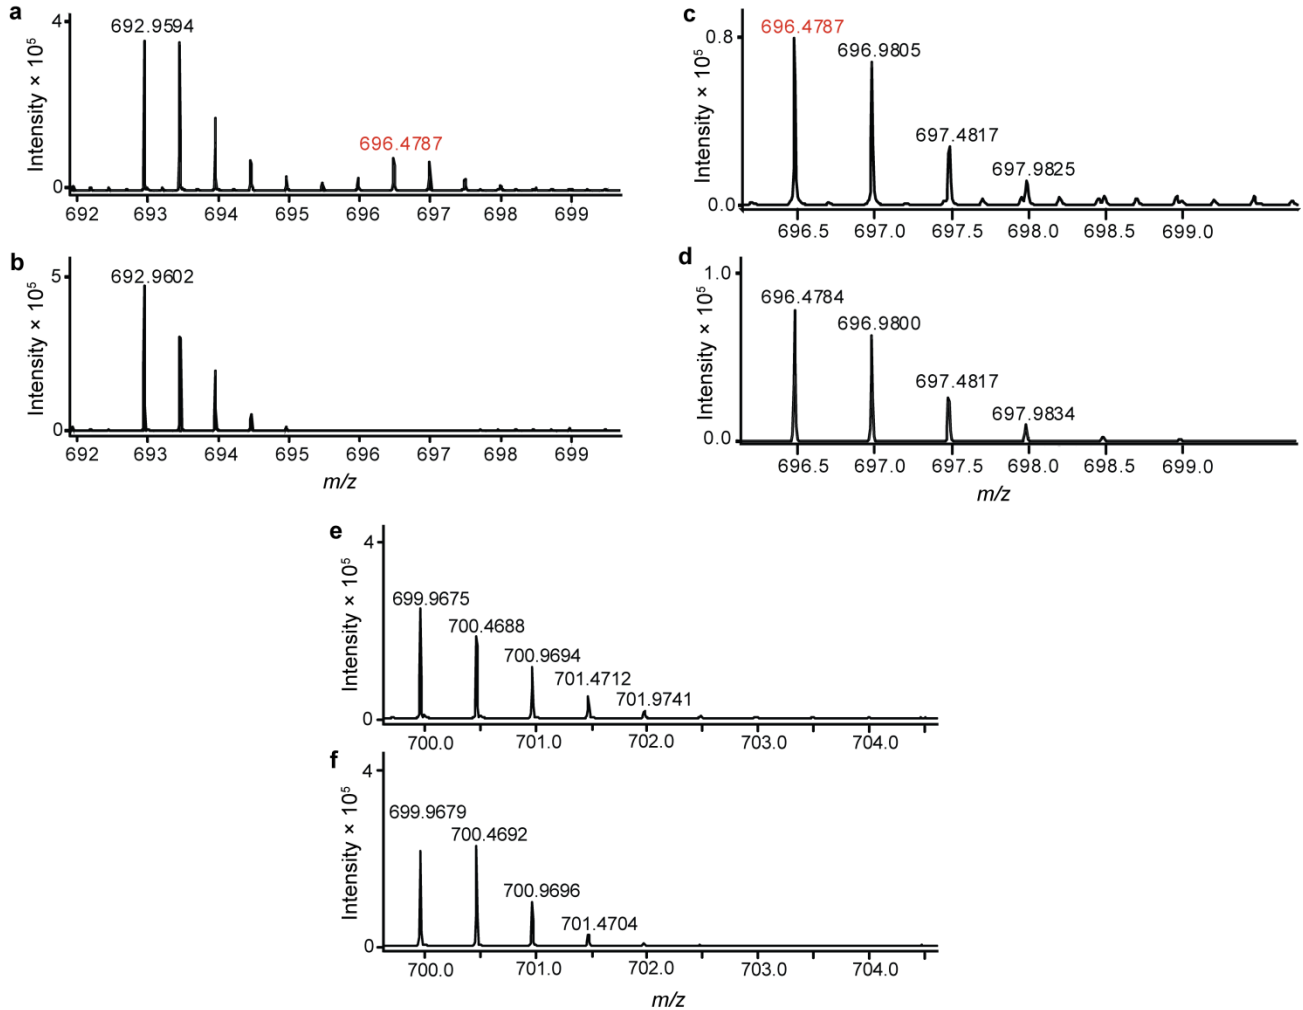

**Supplementary Figure 2: Mass spectra from UHPLC-ESI-Q-TOF-MS analysis of methanolic mycelial extracts from the  $[U-^2H]$ L-valine 11 incorporation experiments.** Spectra resulting from addition of (a) 5 mM  $[U-^2H]$ L-valine 11 and (b) no  $[U-^2H]$ L-valine to the growth medium. The signal at  $m/z = 692.9594$  corresponds to  $[M+Na+H]^{2+}$  for stambomycins C/D 3/4 and the signal at  $m/z = 696.4787$  corresponds to  $[M+Na+H]^{2+}$  for stambomycin C 3 derived from incorporation of  $[U-^2H]$ L-valine 11. Comparison of the spectrum (c) measured for labeled stambomycin C 3 derived from incorporation of  $[U-^2H]$ L-valine 11 with (d) the spectrum calculated for the  $[C_{72}H_{125}D_7NNaO_{22}]^{2+}$  ion. Spectra for stambomycins A/B 1/2 resulting from addition of (e) 5 mM  $[U-^2H]$ L-valine 11 and (f) no  $[U-^2H]$ L-valine to the growth medium. No specific incorporation of the deuterium-labeled precursor is observed.

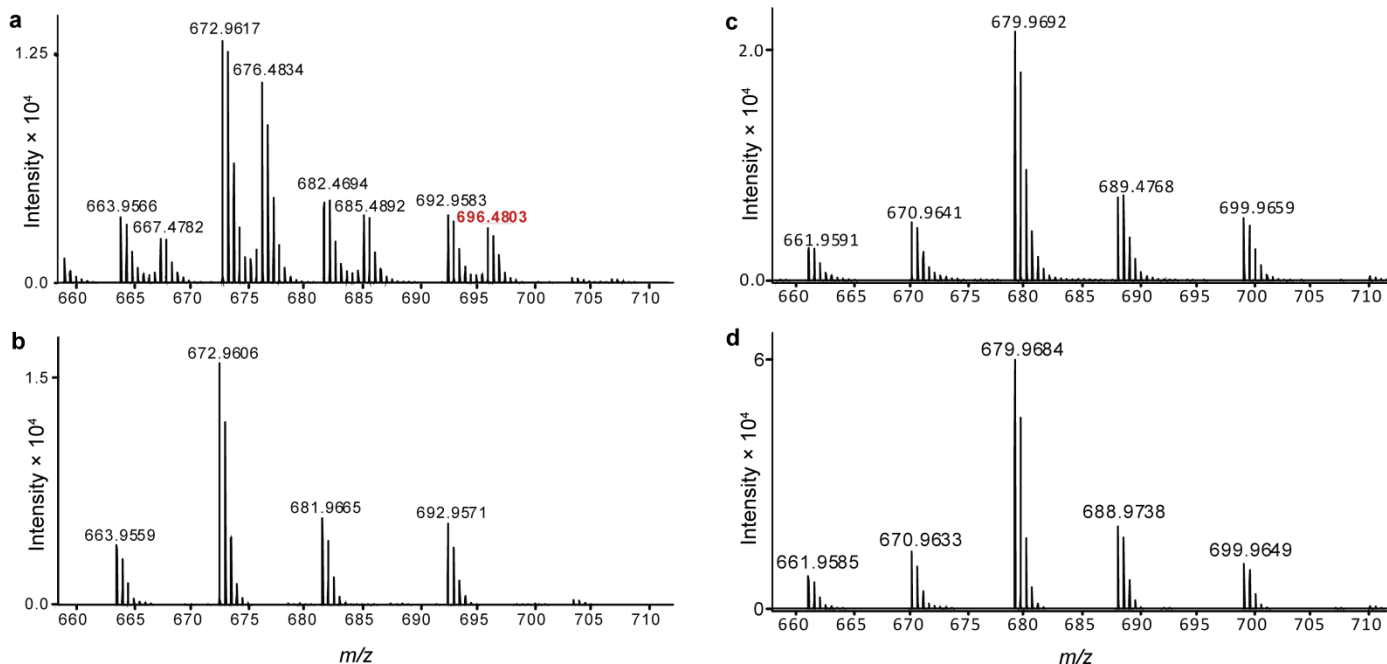

**Supplementary Figure 3: Mass spectra from UHPLC-ESI-Q-TOF-MS analysis of methanolic mycelial extracts from the [U- $^2$ H]butyric acid 12 incorporation experiments.** Spectra resulting from addition of (a) 5 mM [U- $^2$ H]butyric acid 12 and (b) no [U- $^2$ H]butyric acid to the growth medium. The signal at  $m/z = 692.9583$  corresponds to  $[M+Na+H]^{2+}$  for stambomycins C/D 3/4 and the signal at  $m/z = 696.4803$  corresponds to  $[M+Na+H]^{2+}$  for stambomycin D 4 derived from incorporation of [U- $^2$ H]butyric acid 12 (calculated for  $[C_{72}H_{125}D_7NNaO_{22}]^{2+}$ :696.4784). Spectra for stambomycins A/B 1/2 resulting from addition of (c) 5 mM [U- $^2$ H]butyric acid 12 and (d) no [U- $^2$ H]butyric acid to the growth medium. No specific incorporation of the deuterium-labeled precursor is observed.

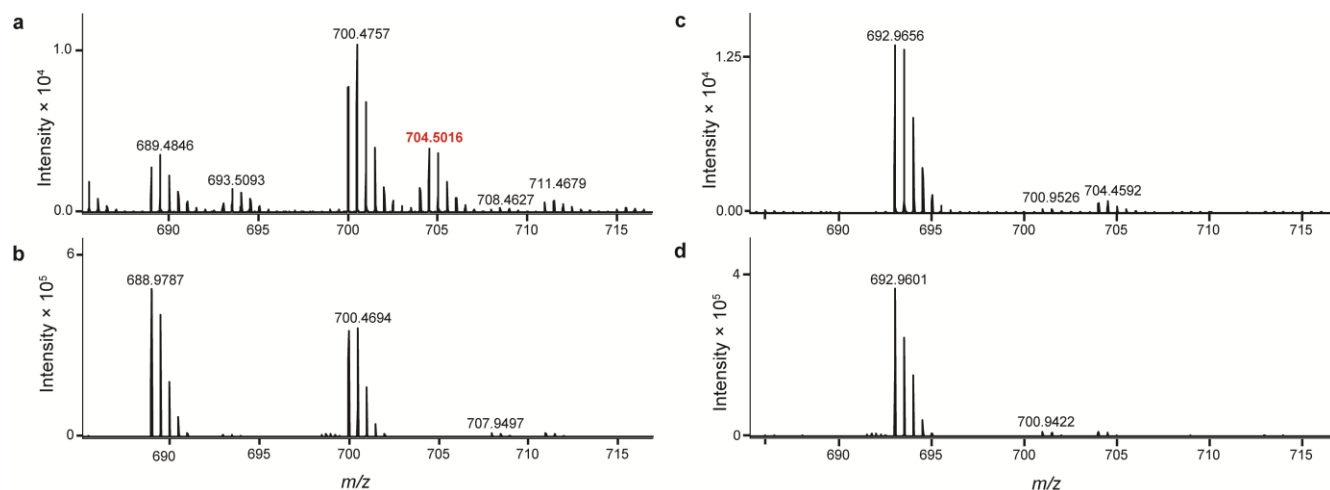

**Supplementary Figure 4: Mass spectra from UHPLC-ESI-Q-TOF-MS analysis of methanolic mycelial extracts from the [U-<sup>2</sup>H]L-isoleucine **9** incorporation experiments.** Spectra resulting from addition of (a) 5 mM [U-<sup>2</sup>H]L-isoleucine **9** and (b) no [U-<sup>2</sup>H]L-isoleucine to the growth medium. The signal at  $m/z = 700.4757$  corresponds to  $[M+Na+H]^{2+}$  for stambomycins A/B **1/2** and the signal at  $m/z = 704.5016$  corresponds to  $[M+Na+H]^{2+}$  for stambomycin A **1** derived from incorporation of [U-<sup>2</sup>H]L-isoleucine **9** (calculated for  $[C_{73}H_{125}D_9NNaO_{22}]^{2+}$ :704.4925;). Spectra for stambomycins C/D **3/4** resulting from addition of (c) 5 mM [U-<sup>2</sup>H]L-isoleucine **9** and (d) no [U-<sup>2</sup>H]L-isoleucine to the growth medium. No specific incorporation of the deuterium-labeled precursor is observed.

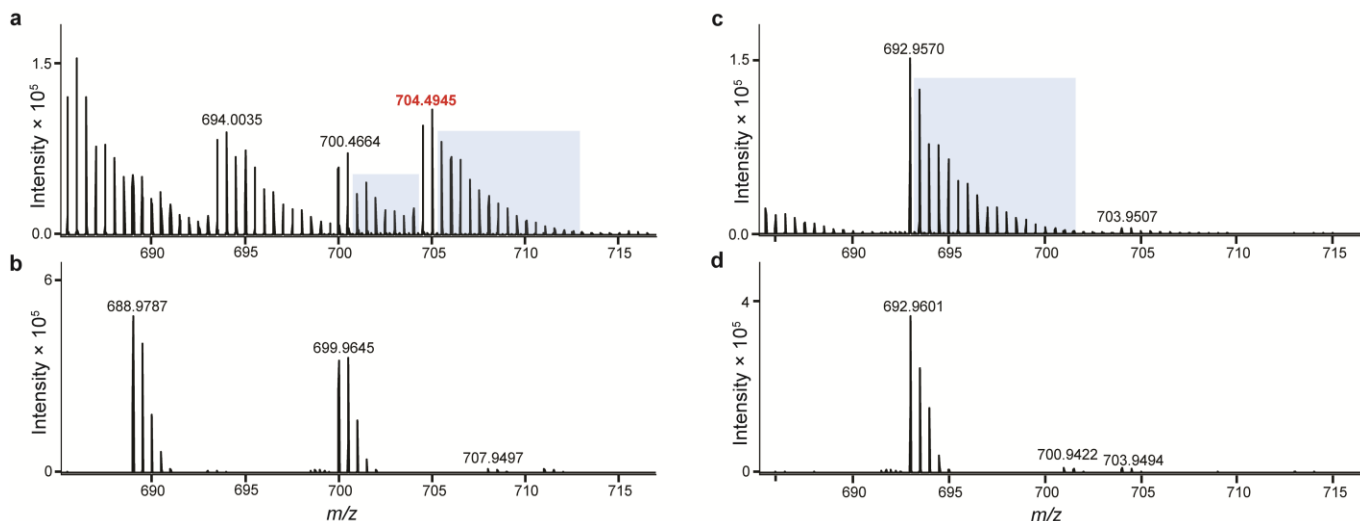

**Supplementary Figure 5: Mass spectra from UHPLC-ESI-Q-TOF-MS analysis of methanolic mycelial extracts from the [U-<sup>2</sup>H]L-leucine 10 incorporation experiments.** Spectra resulting from addition of (a) 5 mM [U-<sup>2</sup>H]L-leucine 10 and (b) no [U-<sup>2</sup>H]L-leucine to the growth medium. The signal at  $m/z = 699.9645$  corresponds to  $[M+Na+H]^{2+}$  for stambomycins A/B 1/2 and the signal at  $m/z = 704.4945$  corresponds to  $[M+Na+H]^{2+}$  for stambomycin B 2 derived from incorporation of [U-<sup>2</sup>H]L-isoleucine 10 (calculated for  $[C_{73}H_{125}D_9NNaO_{22}]^{2+}$ :704.4925). Spectra for stambomycins C/D 3/4 resulting from addition of (c) 5 mM [U-<sup>2</sup>H]L-leucine 10 and (d) no [U-<sup>2</sup>H]L-leucine to the growth medium. No specific incorporation of the deuterium-labeled precursor was observed. The regions of the spectra highlighted by the blue boxes result from the incorporation of deuterium labeled acetyl-CoA derived from the catabolism of [U-<sup>2</sup>H]L-leucine 10.

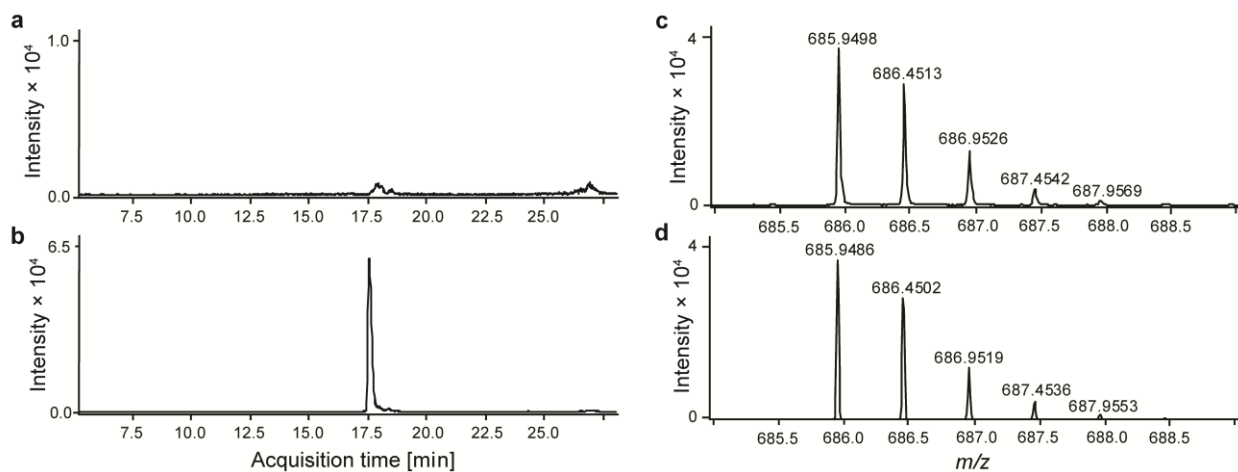

**Supplementary Figure 6: UHPLC-ESI-Q-TOF-MS analysis of methanolic mycelial extracts from the *n*-heptanoic acid incorporation experiments.** Extracted ion chromatogram at  $m/z = 685.9$ , corresponding to  $[M+Na+H]^{2+}$  for stambomycin analogue **22**, from UHPLC-ESI-Q-TOF-MS analyses of methanolic mycelial extracts *S. ambofaciens* W130 grown in the absence (a) and (b) presence of 5 mM *n*-heptanoic acid. (c) Mass spectrum of **22** from UHPLC-ESI-Q-TOF-MS analyses of *S. ambofaciens* W130 fed with *n*-heptanoic acid. (d) Simulated spectrum for  $C_{71}H_{130}NNaO_{22}^{2+}$ .

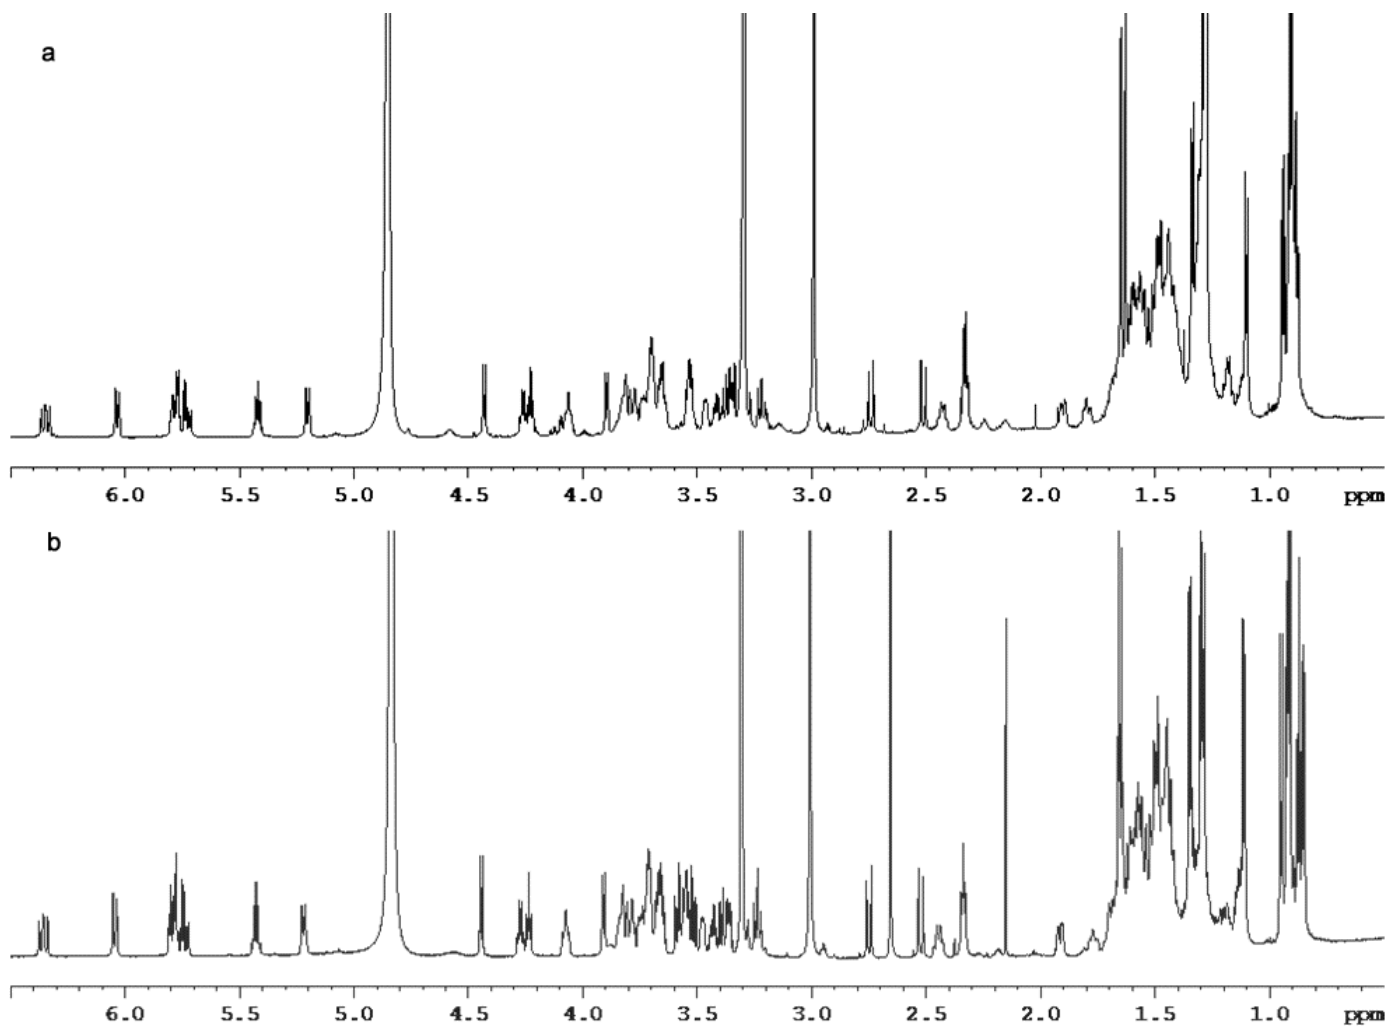

**Supplementary Figure 7: Comparison of the <sup>1</sup>H NMR spectra (700 MHz, d<sub>4</sub>-MeOH) of (a) 22 and (b) stambomycins C/D 3/4.**



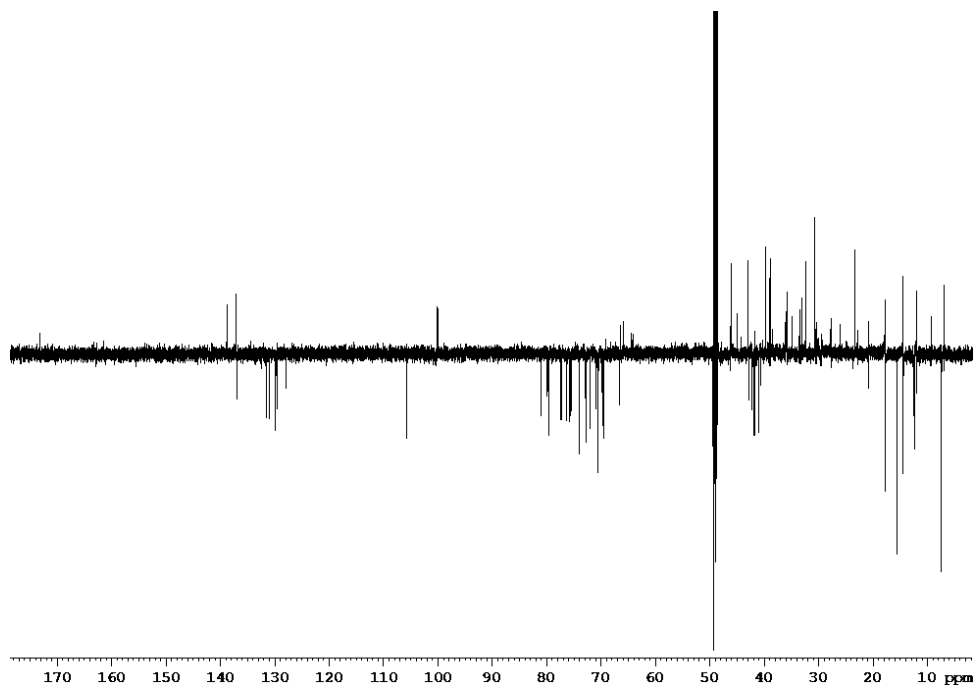

Supplementary Figure 8:  $^{13}\text{C}$ -APT NMR spectrum (175 MHz,  $\text{d}_4\text{-MeOH}$ ) of 22.

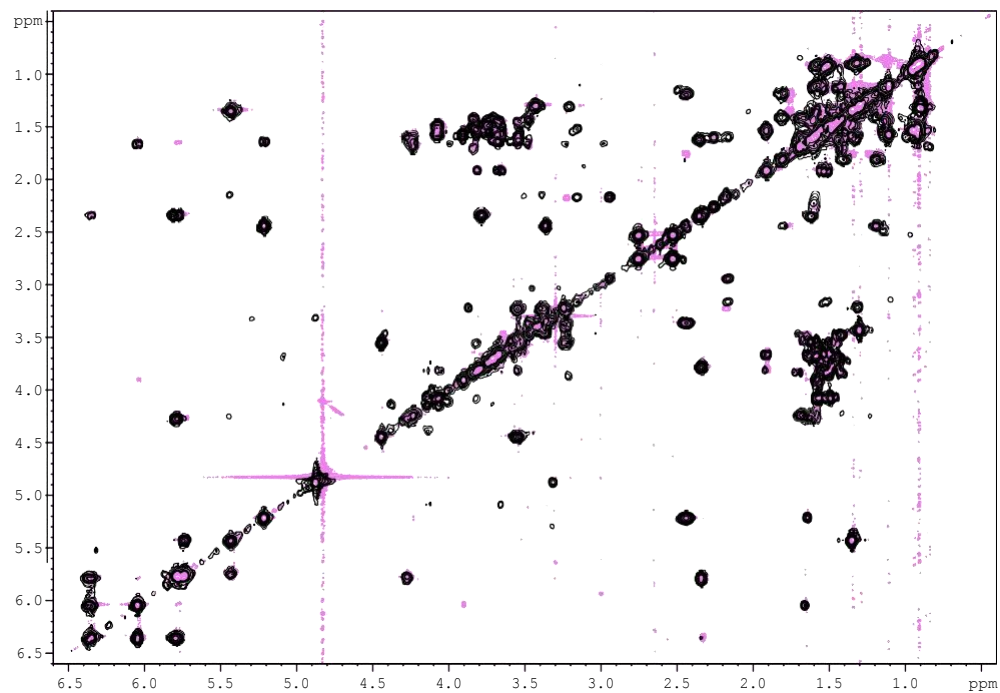

**Supplementary Figure 9: Overlaid COSY NMR spectra (700 MHz, d<sub>4</sub>-MeOH) of 22 (black) and stambomycins C/D 3/4 (pink).**

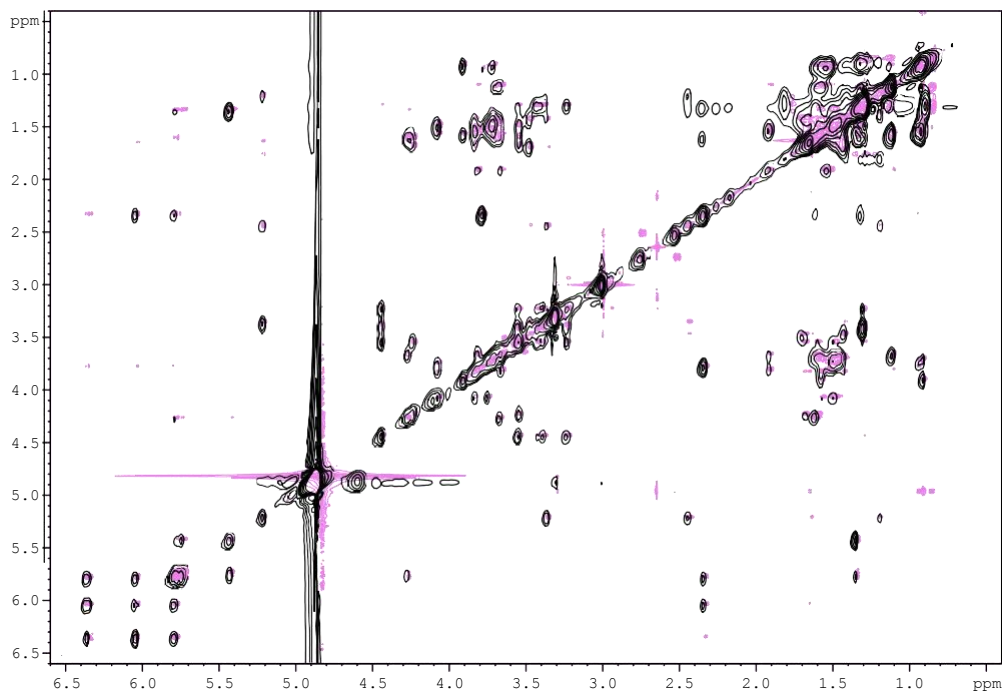

**Supplementary Figure 10: Overlaid TOCSY NMR spectra (700 MHz,  $d_4$ -MeOH) of 22 (black) and stambomycins C/D 3/4 (pink).**

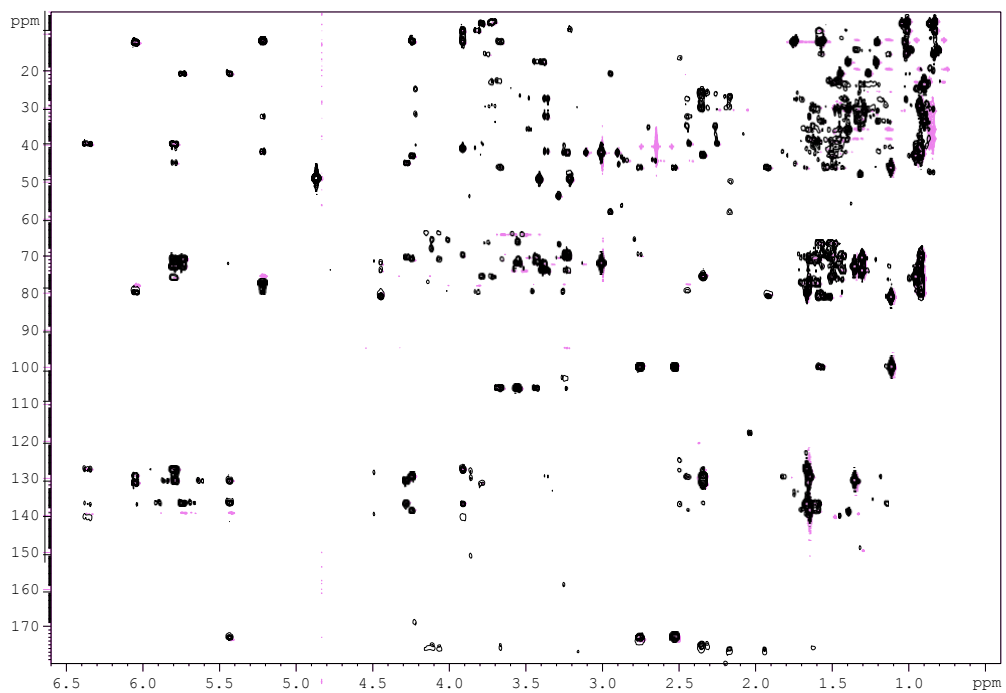

**Supplementary Figure 11: Overlaid HMBC NMR spectra (700 MHz / 175 MHz, d<sub>4</sub>-MeOH) of 22 (black) and stambomycins C/D 3/4 (pink).**

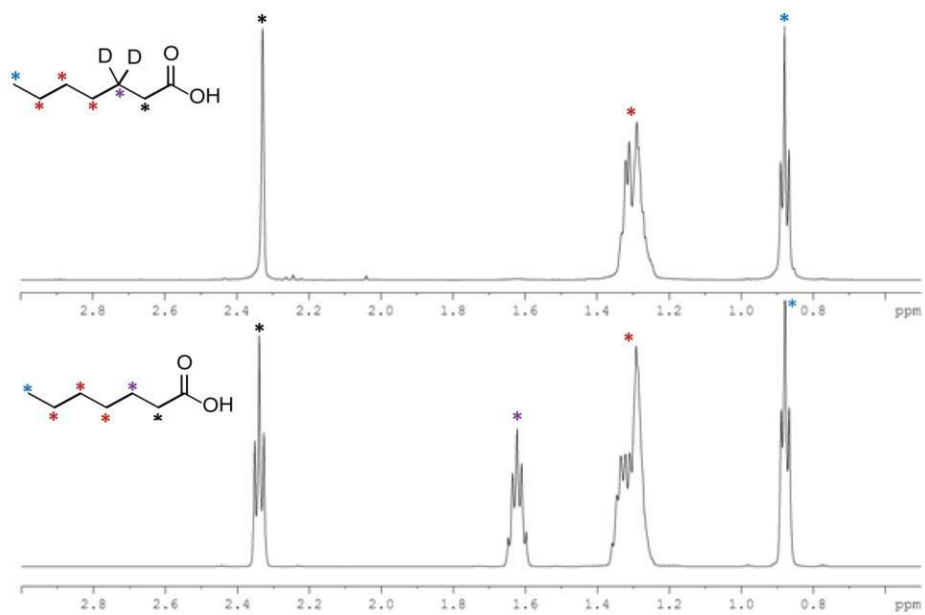

Supplementary Figure 12: Comparison of the <sup>1</sup>H NMR spectra of [3-<sup>2</sup>H<sub>2</sub>]heptanoic acid 23 and unlabeled *n*-heptanoic acid 21.

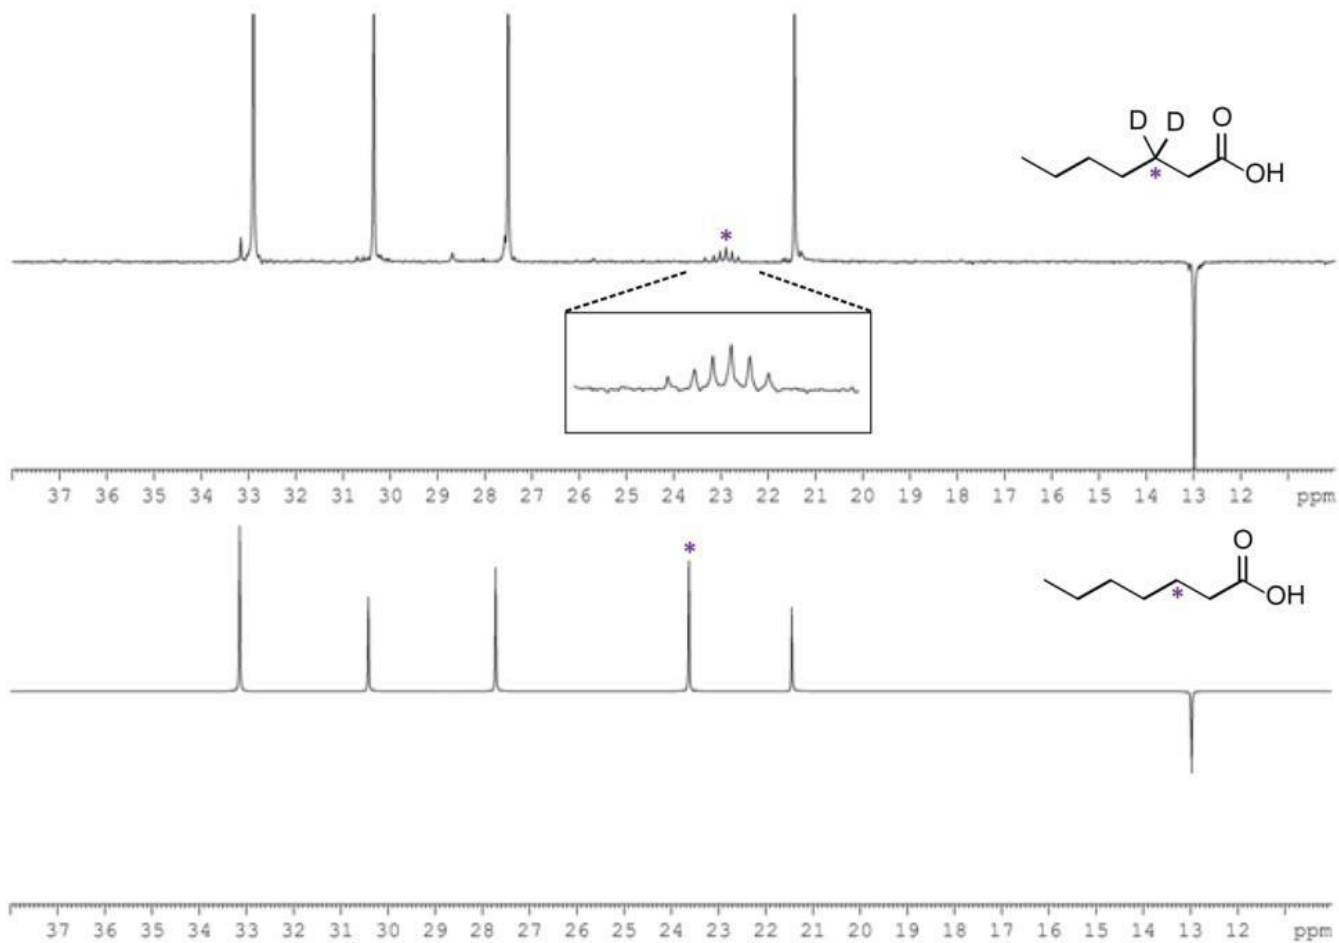

**Supplementary Figure 13: Comparison of the <sup>13</sup>C NMR spectra of [3-<sup>2</sup>H<sub>2</sub>]heptanoic acid 23 and unlabelled *n*-heptanoic acid 21. The splitting of the C-3 signal as a result of the attached deuterium atoms is shown in the inset.**

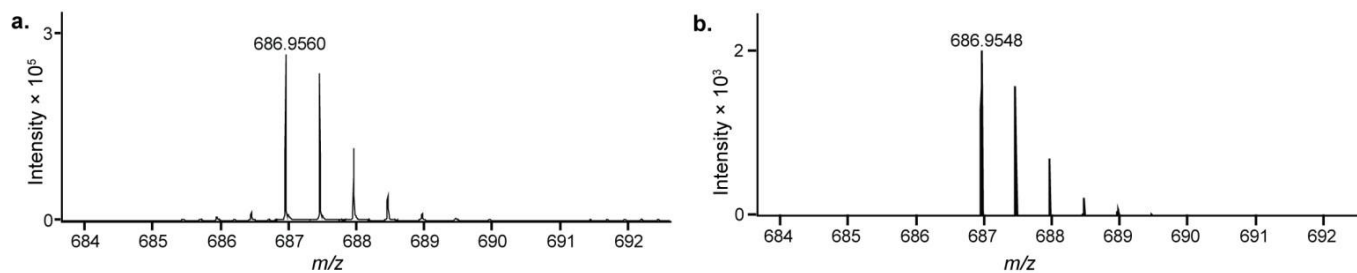

**Supplementary Figure 14: Mass spectra from UHPLC-ESI-Q-TOF-MS analysis of the stambomycin analogue **22** produced as a result of feeding [3- $^2\text{H}_2$ ]heptanoic acid to *S. ambifaciens* W130. (a) Measured spectrum. (b) Simulated spectrum for  $\text{C}_{71}\text{H}_{128}\text{D}_2\text{NNaO}_{22}^{2+}$  corresponding to  $[\text{M}+\text{Na}+\text{H}]^+$  for doubly labeled **22**.**

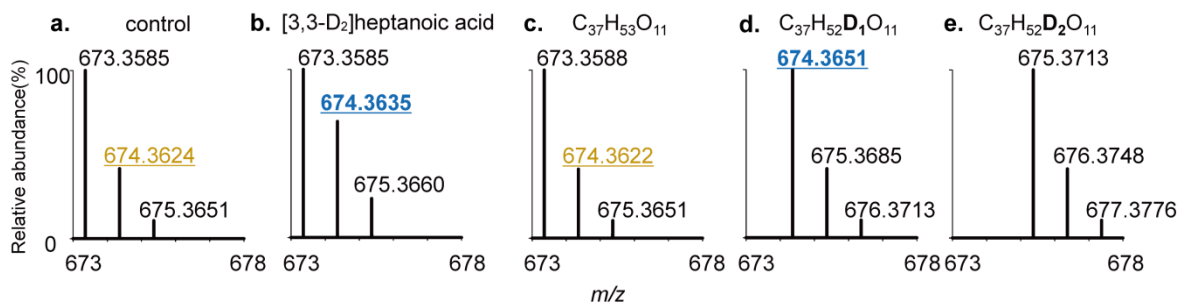

**Supplementary Figure 15: Mass spectra from ESI-TOF-MS analysis of partially purified reveromycin D 32 produced from [3- $^2H_2$ ]heptanoic acid incorporation experiments.** Comparison of ESI-TOF mass spectra of partially purified reveromycin D 32 from cultures of *Streptomyces* sp. SN-593  $\Delta revR$  mutant grown in the absence (a) and presence (b) of [3- $^2H_2$ ]heptanoic acid. Simulated isotope distributions for unlabeled (c), singly-labeled (d) and doubly-labeled reveromycin D (e). The data are consistent with 20% incorporation of singly-labeled heptanoic acid into 32.



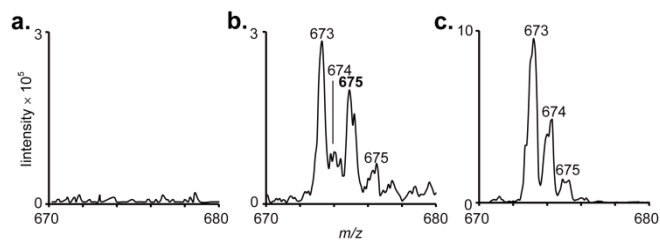

**Supplementary Figure 16: LC-MS analysis of partially purified extracts from the [3-<sup>2</sup>H<sub>2</sub>]heptanoic acid incorporation experiments.** Mass spectra of reveromycin D **32** from LC-MS analyses of partially purified extracts from the cultures of (a) the  $\Delta revT$  mutant, (b) the  $\Delta revT::samR0483$  mutant to which [3-<sup>2</sup>H<sub>2</sub>]heptanoic acid **23** has been fed, and (c) wild type *Streptomyces* sp. SN-593.

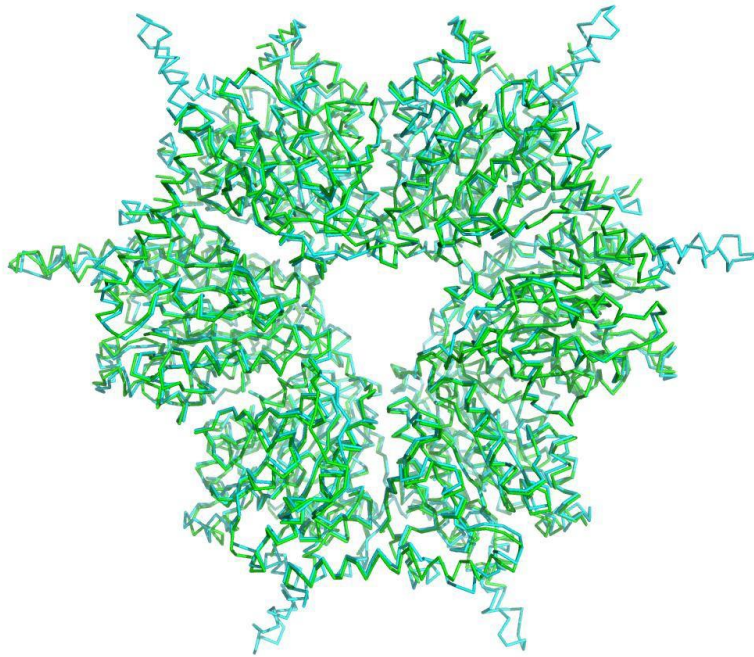

**Supplementary Figure 17: Superimposition of PccB from *S. coelicolor* (cyan) with MccB from *S. ambofaciens* (green).** The structures are displayed as colored ribbons.

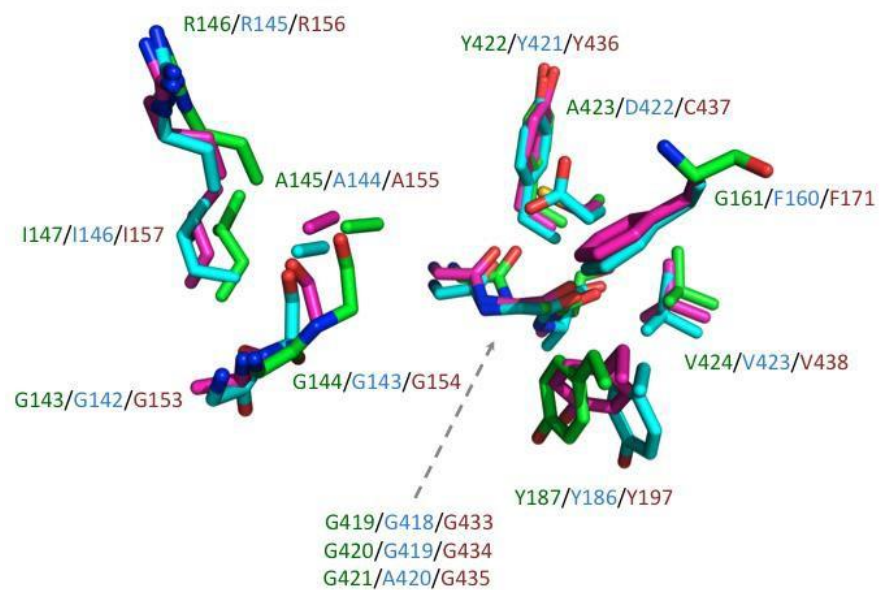

**Supplementary Figure 18: Structural comparison of MccB (PDB ID: 5INI), PccB (PDB ID: 1XNY), and AccD5 (PDB ID: 2A7S) active site residues. Colors are green, cyan, and magenta, respectively.**

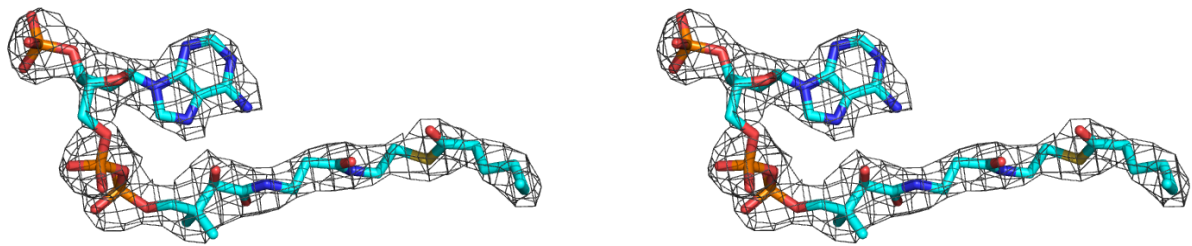

**Supplementary Figure 19: Stereo view of hexanoyl-CoA bound to MccB with 2F0-FC SA omit map contoured 1.0  $\sigma$  at 2.85 Å. The surrounding protein has been removed for clarity.**

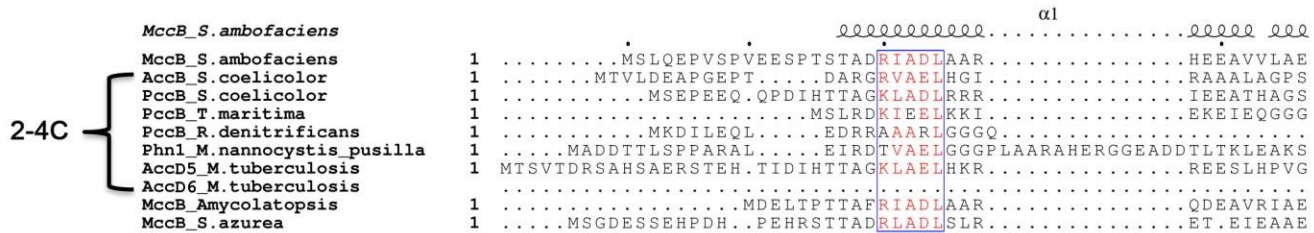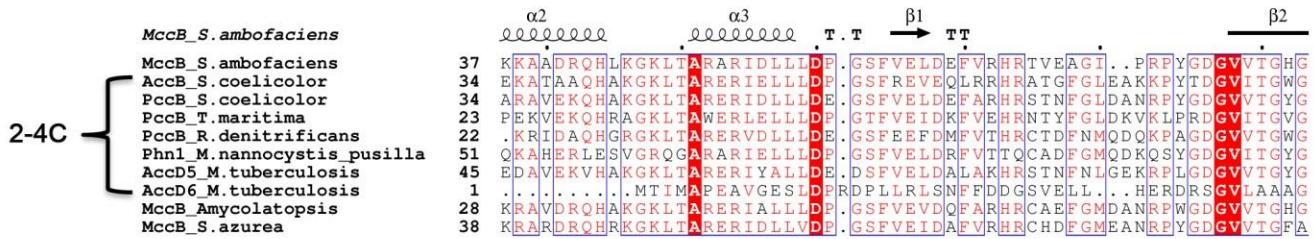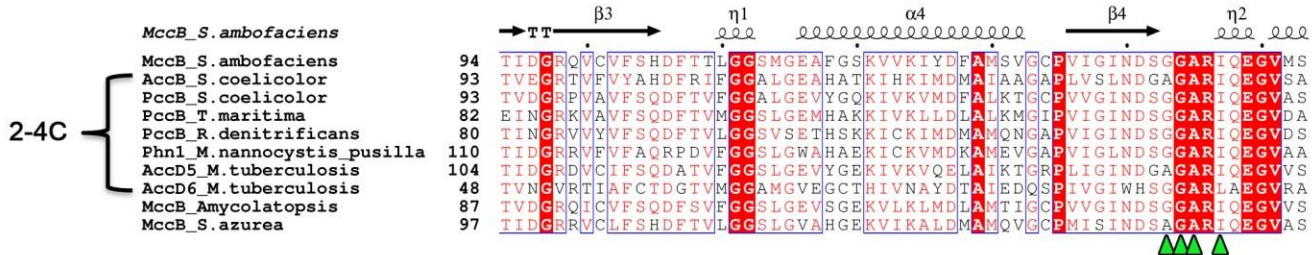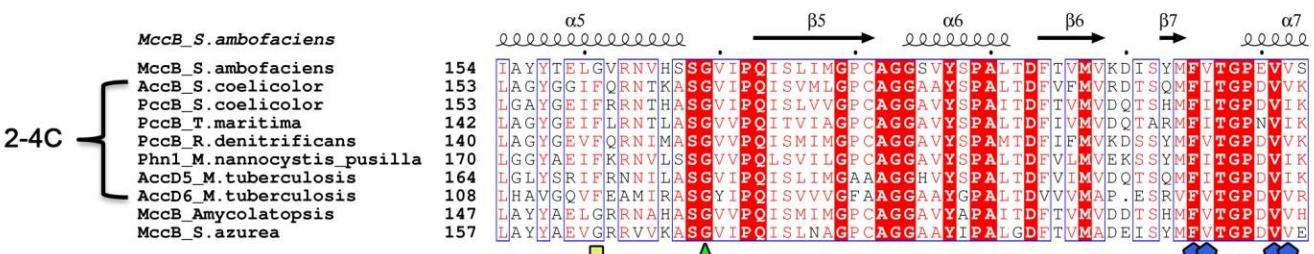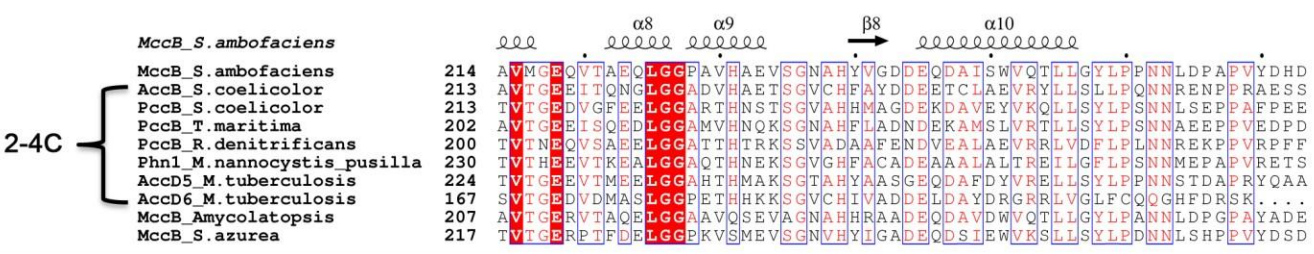



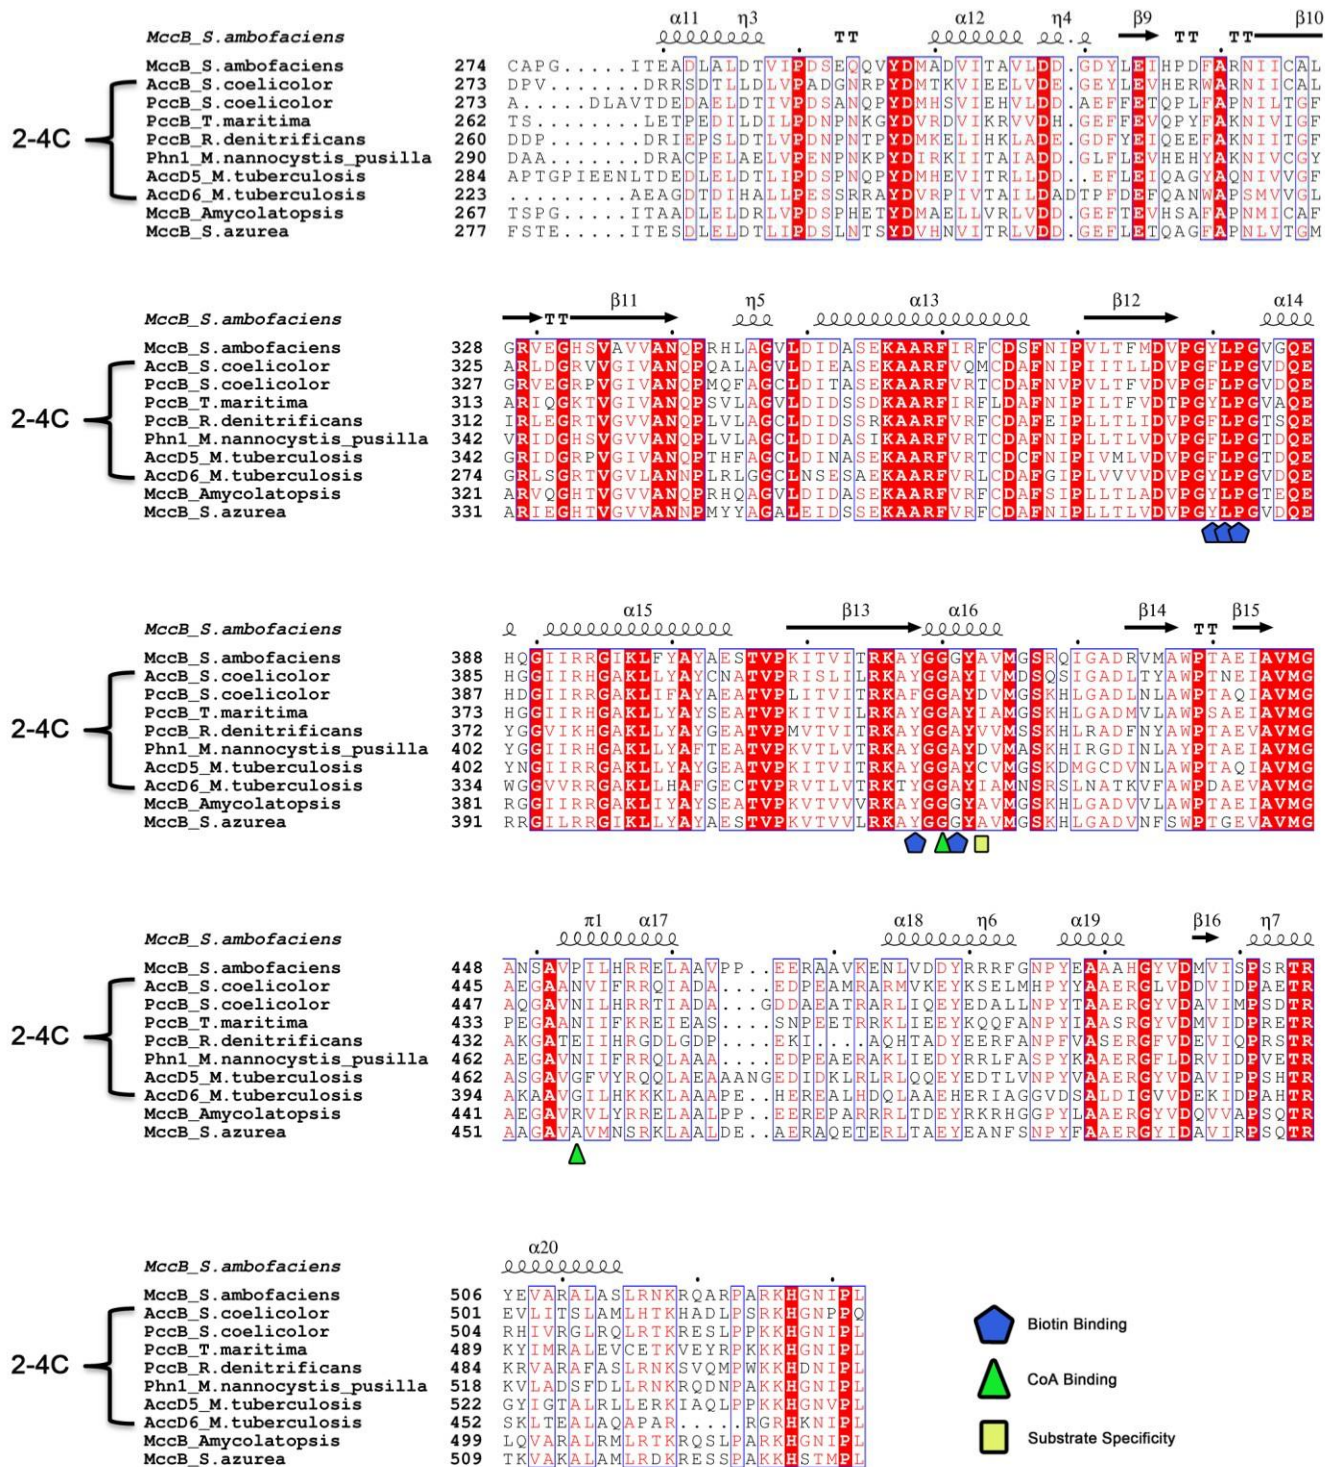

**Supplementary Figure 20: Sequence alignment of MccB from *S. ambofaciens* with other ACC  $\beta$ -subunits.** The enzymes denoted 2-4C use acetyl-, propionyl or butyryl-CoA as a substrate. MccB in *Streptomyces azurea* is proposed to assemble butylmalonyl-CoA and other 6-8 carbon extender units incorporated by PriA6 into the primycins.<sup>9</sup>

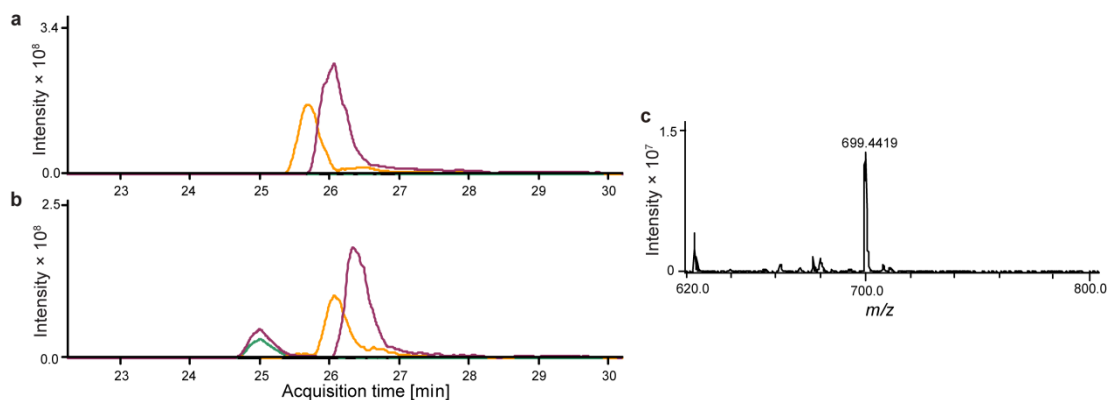

**Supplementary Figure 21: UHPLC-ESI-Q-TOF-MS analysis of methanolic mycelial extracts from the 6-azidohexanoic acid incorporation experiments.** EICs at  $m/z = 699.4$ , corresponding to  $[M+H+Na]^{2+}$  for stambomycin analogue **37** (green), at  $m/z = 692.9$ , corresponding to  $[M+H+Na]^{2+}$  for stambomyces C/D **3/4** (orange), and at  $m/z = 699.9$ , corresponding to  $[M+H+Na]^{2+}$  for stambomyces A/B **1/2** (purple), from UHPLC-ESI-Q-TOF-MS analyses of methanolic mycelial extracts of *S. ambofaciens* W130 grown in the absence (**a**) and presence (**b**) of 5 mM 6-azidohexanoic acid. (**c**) Measured mass spectrum for peak corresponding to stambomycin analogue **37** with a retention time of 25 minutes (calculated for  $C_{70}H_{127}N_4NaO_{22}^+$ : 699.4414).

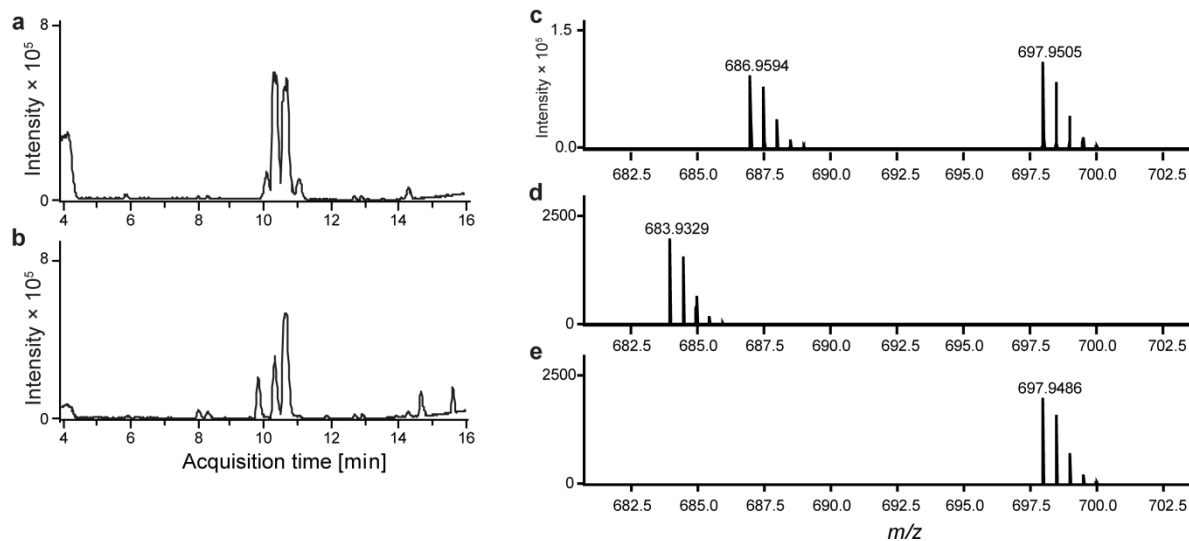

**Supplementary Figure 22: UHPLC-ESI-Q-TOF-MS analysis of methanolic mycelial extracts from the 6-heptynoic acid incorporation experiments.** Base peak chromatograms from UHPLC-ESI-Q-TOF-MS analyses of mycelial extracts of *S. ambofaciens* W130 grown in the absence (a) and presence (b) of 5 mM 6-heptynoic acid. The peaks with retention times of 10.3 minutes and 10.7 minutes correspond to stambomycins C/D **3/4** and stambomycins A/B **1/2**, respectively. A new peak with a retention time of 9.8 minutes, corresponding to a novel stambomycin analogue is observed. (c) Mass spectrum of the stambomycin analogue with a retention time of 9.8 minutes observed in UHPLC-ESI-Q-TOF-MS analyses of *S. ambofaciens* W130 fed with 6-heptynoic acid. (d) Simulated spectrum for  $C_{71}H_{126}NNaO_{22}^{2+}$ , corresponding to the stambomycin analogue expected to result from direct incorporation of 6-heptynoic acid. (e) Simulated spectrum for  $C_{73}H_{130}NNaO_{22}^{2+}$ , corresponding to stambomycin analogue **39**.



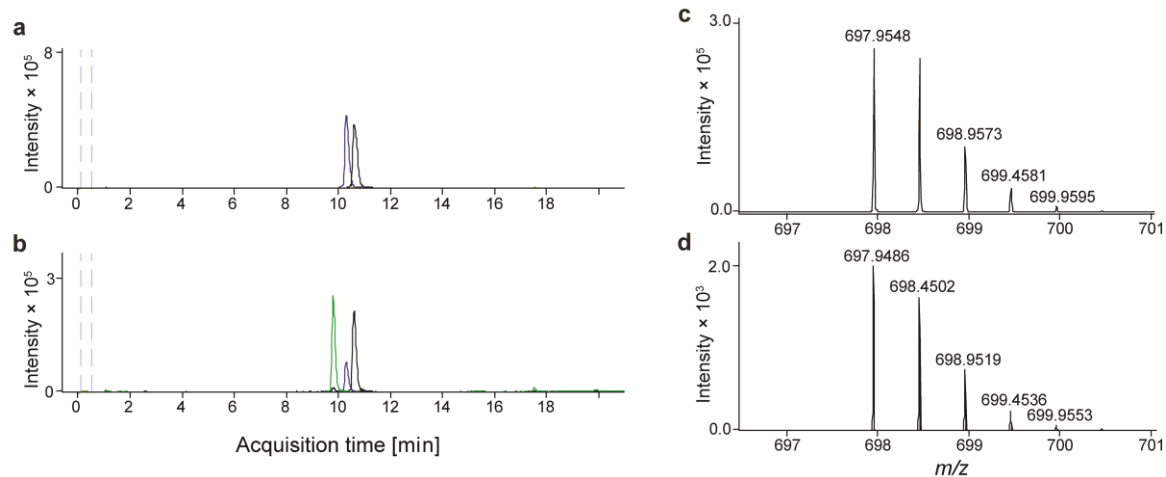

**Supplementary Figure 23: UHPLC-ESI-Q-TOF-MS analysis of methanolic mycelial extracts from the 8-nonynoic acid incorporation experiments.** EICs at  $m/z = 697.9$ , corresponding to  $[M+H+Na]^{2+}$  for stambomycin analogue **39** (green), at  $m/z = 692.9$ , corresponding to  $[M+H+Na]^{2+}$  for stambomycins C/D **3/4** (blue), and at  $m/z = 699.9$ , corresponding to  $[M+H+Na]^{2+}$  for stambomycins A/B **1/2** (black), from UHPLC-ESI-Q-TOF-MS analyses of methanolic mycelial extracts of *S. ambofaciens* W130 grown in the absence (a) and presence (b) of 5 mM 8-nonynoic acid. (c) Measured and (d) simulated mass spectra for the  $[M+Na+H]^{2+}$  ion of stambomycin analogue **39**.

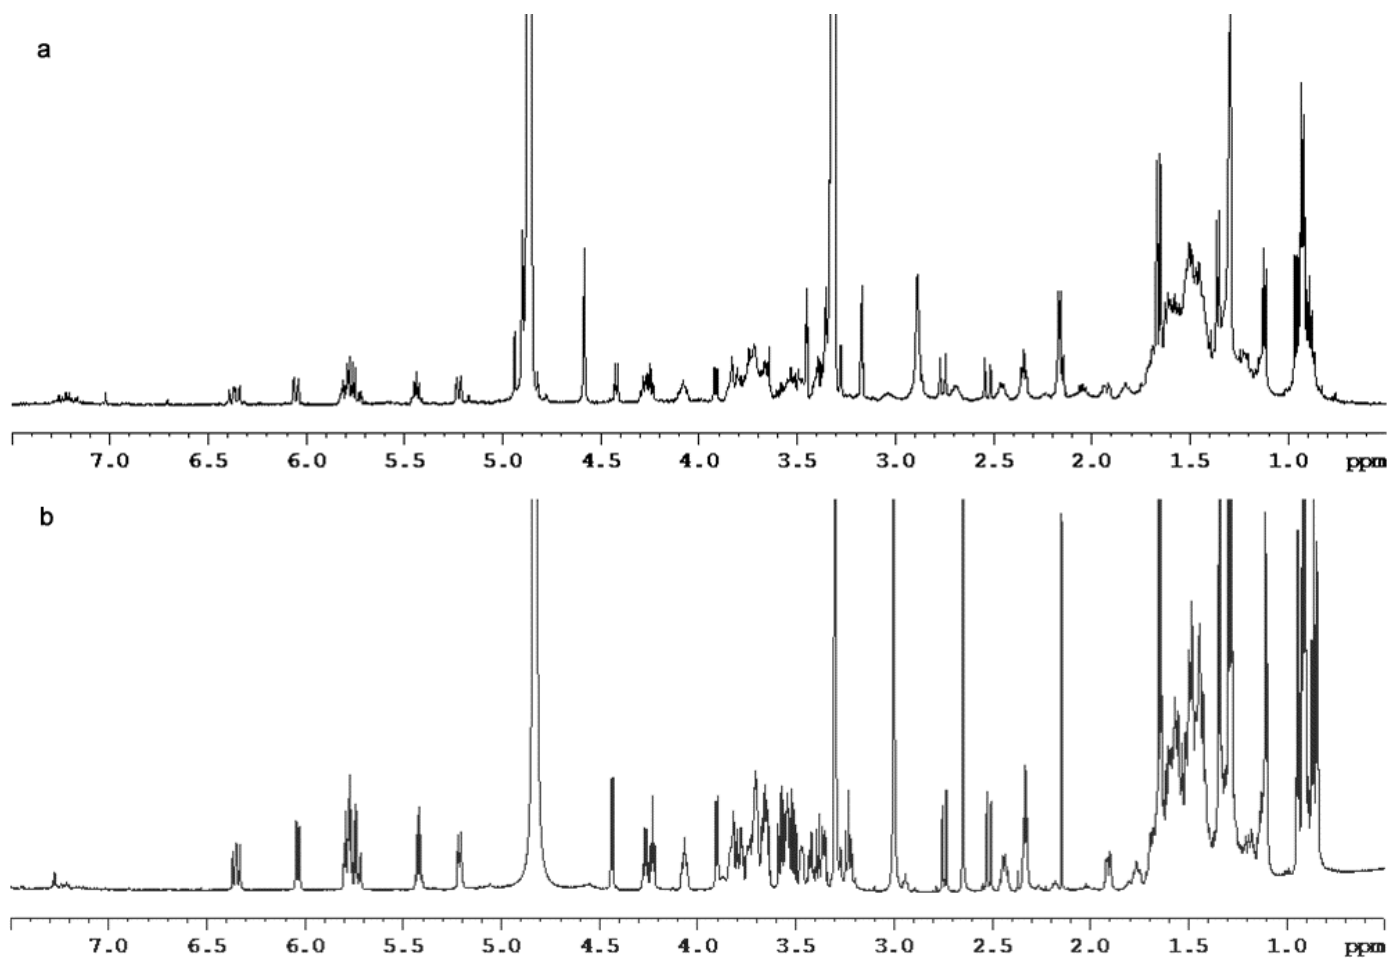

Supplementary Figure 24: Comparison of <sup>1</sup>H-NMR spectra (600 MHz, MeOD) for (a) stambomycin analogue 39 and (b) stambomycins C/D 3/4 .

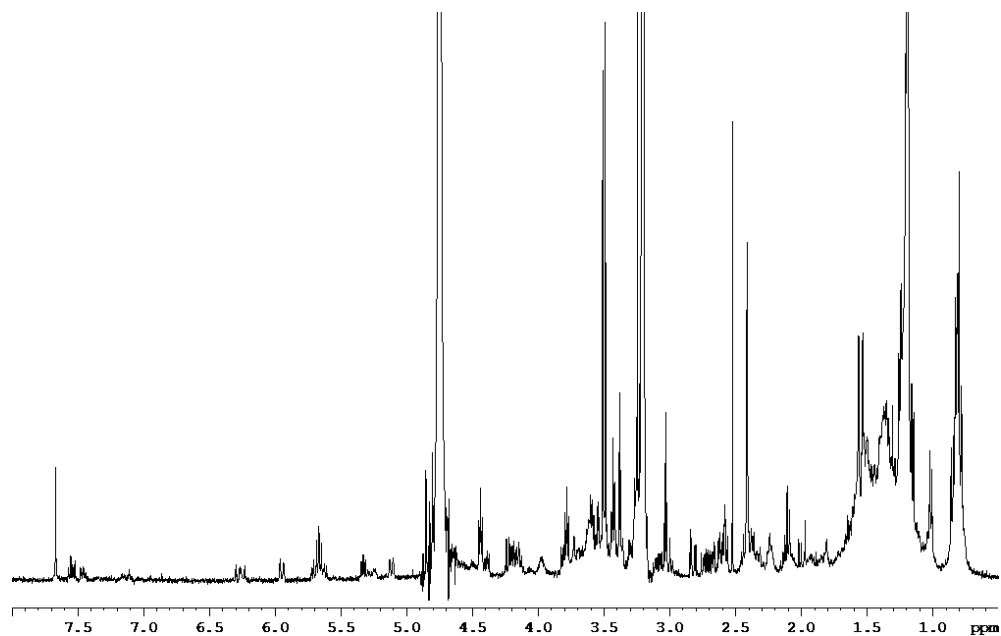

**Supplementary Figure 25: <sup>1</sup>H-NMR (400 MHz, MeOD) spectrum of biotinylated stambomycin analogue derived from the click reaction of stambomycin analogue 39 with the azide-PEG3-biotin conjugate.** The signal at 7.68 ppm corresponds to the triazole proton and the signals at 4.2 ppm correspond to the protons around the fused thiolane ring of biotin.

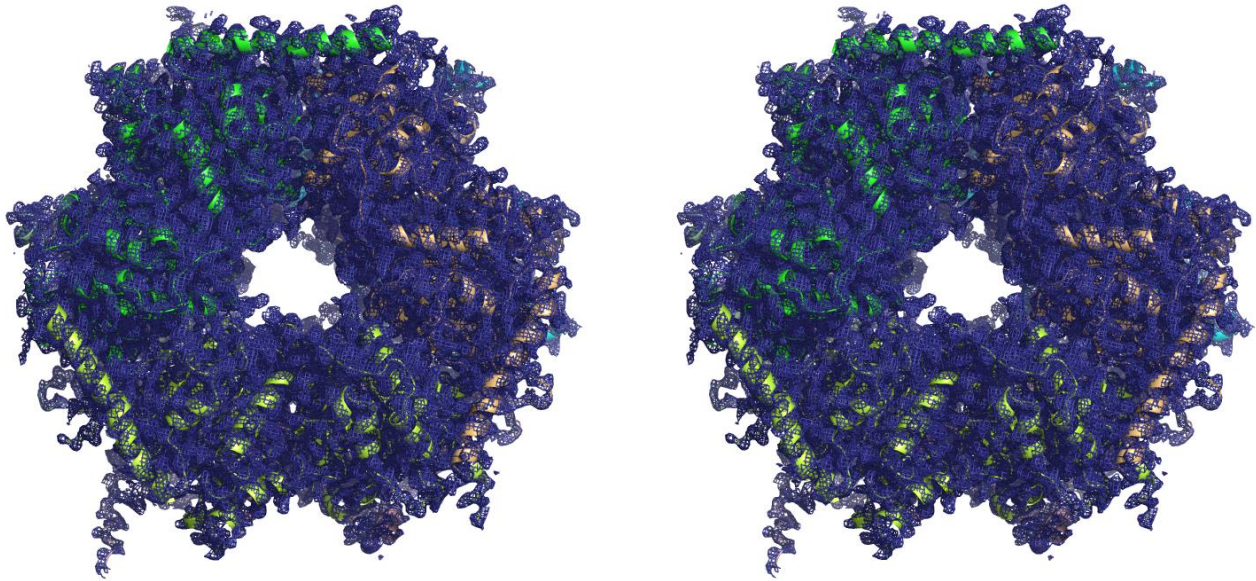

Supplementary Figure 26: Stereo view of the apo-MccB hexamer with 2F0-FC map contoured to  $1.0 \sigma$  at 2.45 Å.

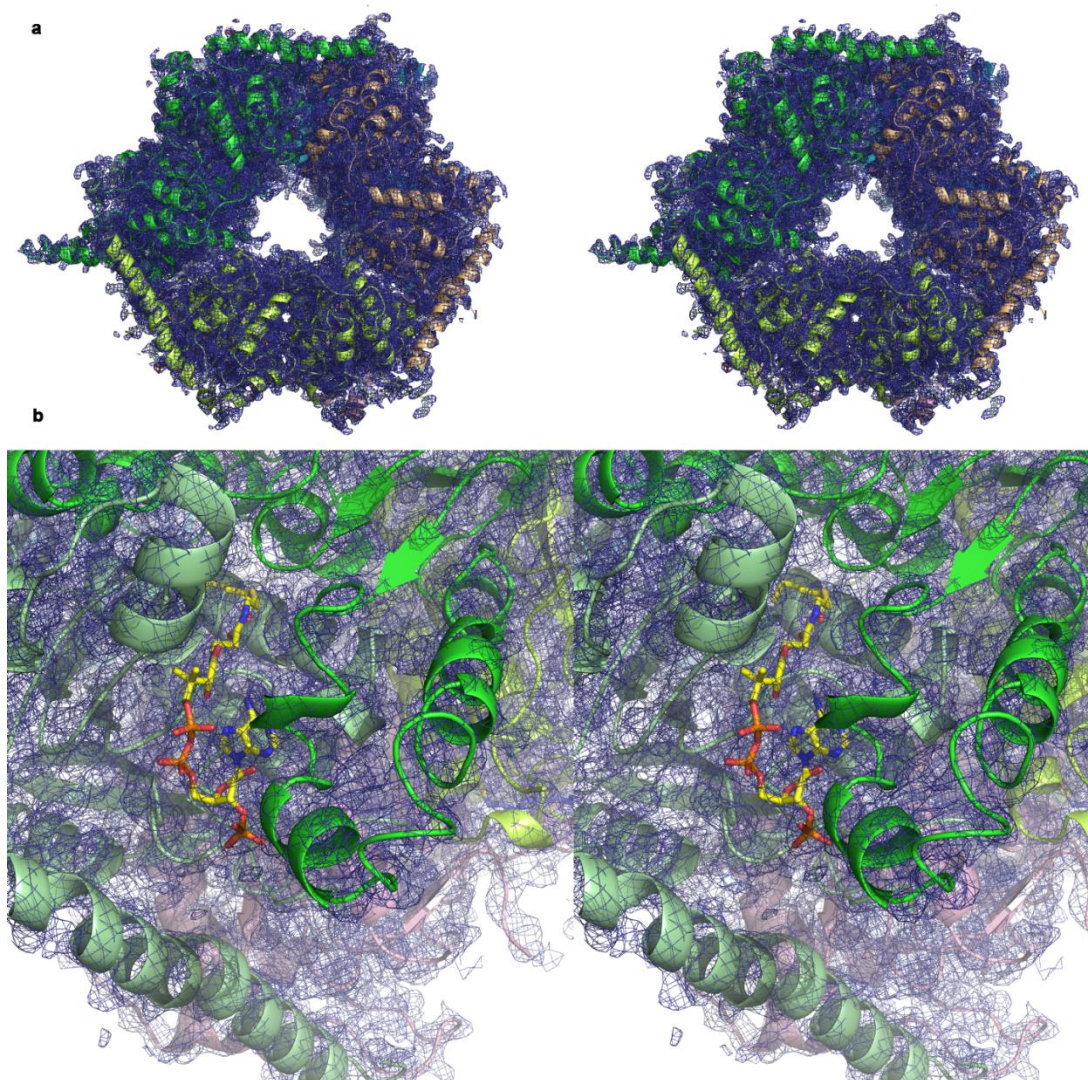

**Supplementary Figure 27: Stereo views of the MccB hexamer bound to four molecules of hexanoyl-CoA. (a)** The overall architecture of MccB bound to four molecules of hexanoyl-CoA. **(b)** The active site pocket at the dimer interface of opposing MccB monomers. 2F0-FC maps are contoured to  $1.0 \sigma$  at  $2.85 \text{ \AA}$ .



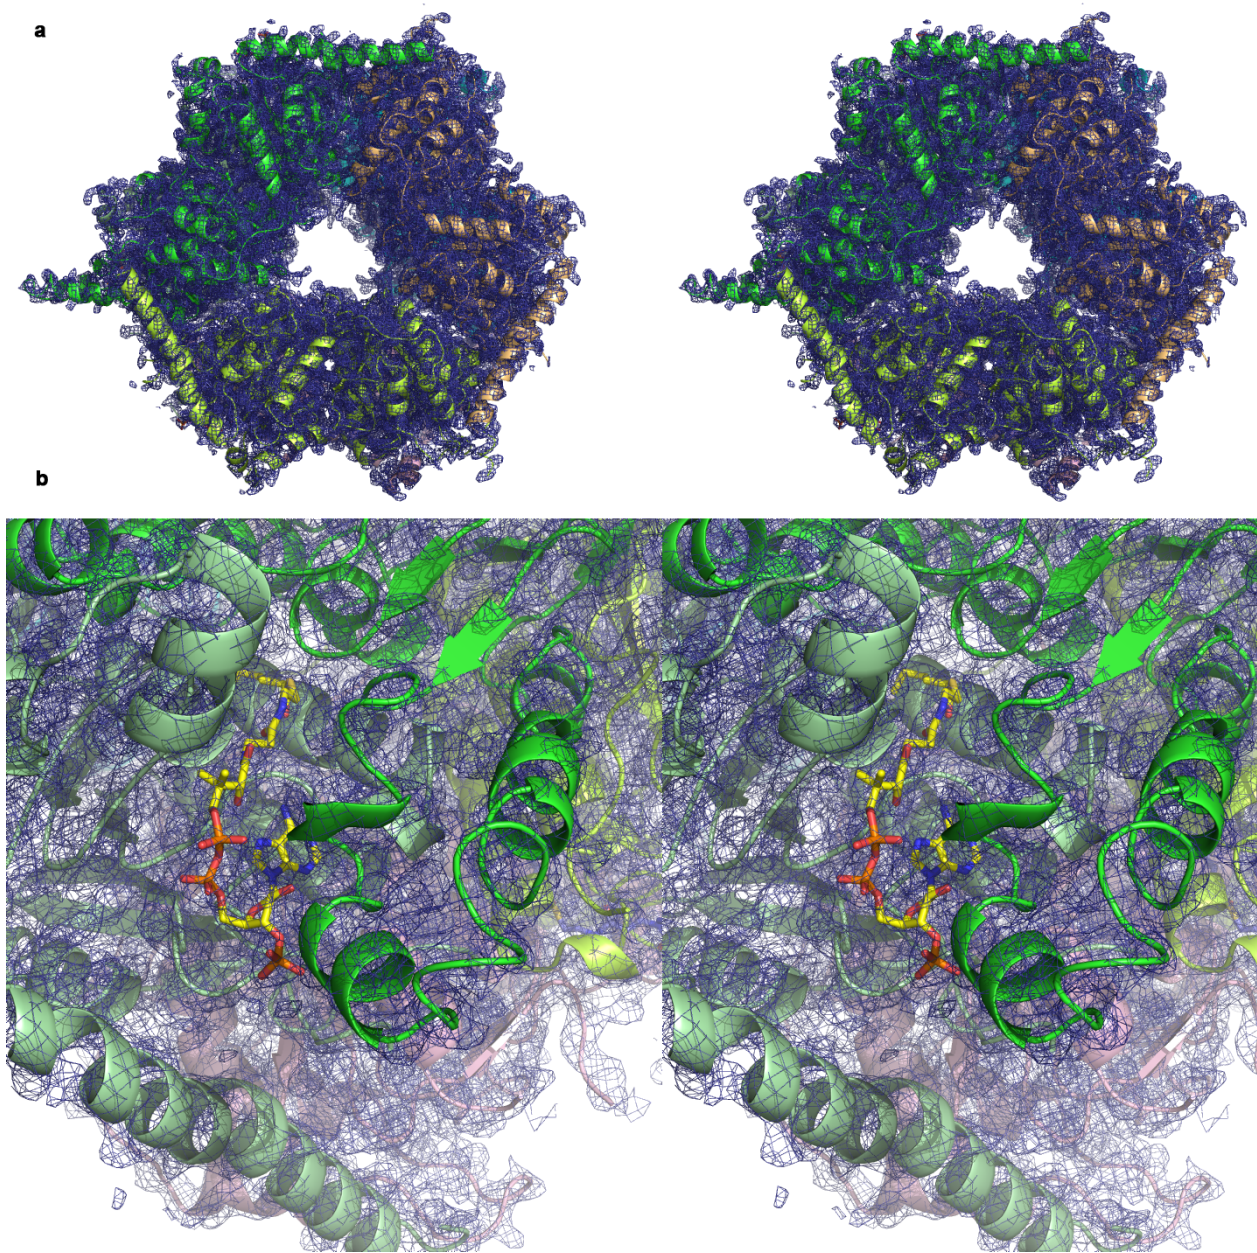

**Supplementary Figure 28: Stereo views of the MccB hexamer bound to one molecule of hexanoyl-CoA. (a)** The overall architecture of MccB bound to one molecule of hexanoyl-CoA. **(b)** The active site pocket at the dimer interface of opposing MccB monomers. 2F<sub>0</sub>-F<sub>c</sub> maps are contoured to 1.0  $\sigma$  at 2.75 Å.

**Supplementary Table 1:** Bacterial strains and plasmids

| Strain/plasmid                                                      | Relevant characteristics                                                                                                                  | Ref.      |
|---------------------------------------------------------------------|-------------------------------------------------------------------------------------------------------------------------------------------|-----------|
| <b>Strain</b>                                                       |                                                                                                                                           |           |
| <i>S. ambifaciens</i> ATCC 23877                                    | Wild-type strain, in which stambomycin cluster is poorly expressed                                                                        | 4         |
| <i>S. ambifaciens</i> W130                                          | Stambomycin producing strain in which <i>samR0484</i> is integrated into the chromosome and is under control of the <i>ermE*</i> promoter | This work |
| <i>E. coli</i> ET12567/pUZ8002                                      | Strain used for conjugal transfer of pOSV556t derivatives into <i>S. ambifaciens</i> ATCC 23877                                           | 5         |
| <i>Streptomyces</i> sp. SN-593                                      | Wild-type reveromycin-producing strain                                                                                                    | 6         |
| <i>E. coli</i> GM2929 <i>hsdS</i> ::Tn10 / pUB307- <i>aph</i> ::Tn7 | Strain used for conjugal transfer of pTYM19 derivatives into <i>Streptomyces</i> sp. SN-593                                               | 7         |
| $\Delta revT$                                                       | <i>revT</i> disruptant of <i>Streptomyces</i> sp. SN-593                                                                                  | 8         |
| $\Delta revR$                                                       | <i>revR</i> disruptant of <i>Streptomyces</i> sp. SN-593                                                                                  | 8         |
| $\Delta revT$ :: <i>samR0483</i>                                    | $\Delta revT$ mutant complemented with pTYM19- <i>P<sub>aph</sub></i> - <i>samR0483</i>                                                   | This work |
| <b>Plasmid</b>                                                      |                                                                                                                                           |           |
| pOSV556t                                                            | Integrative <i>E. coli</i> - <i>Streptomyces</i> shuttle vector                                                                           | 9         |
| pOSV556t- <i>samR0484</i>                                           | <i>samR0484</i> inserted between the <i>Hind</i> III and <i>Cl</i> I sites of pOSV556t                                                    | This work |
| pOSV556t- <i>samR0483</i>                                           | <i>samR0483</i> inserted between the <i>Hind</i> III and <i>Cl</i> I sites of pOSV556t                                                    | This work |
| pTYM19                                                              | Integrative <i>Streptomyces</i> - <i>E. coli</i> shuttle vector                                                                           | 10        |
| pTYM19- <i>P<sub>aph</sub></i>                                      | Derivative of pTYM19 in which the <i>aph</i> II promoter fragment is inserted into the <i>Eco</i> RI and <i>Bam</i> HI sites.             | 11        |
| pTYM19- <i>P<sub>aph</sub></i> - <i>samR0483</i>                    | <i>samR0483</i> inserted into <i>Bam</i> HI and <i>Hind</i> III sites of pTYM19- <i>P<sub>aph</sub></i>                                   | This work |
| pET151- <i>samR0483</i>                                             | MccB overproduction construct                                                                                                             | This work |
| pET28a- <i>samR0483</i>                                             | MccB overproduction construct                                                                                                             | This work |

**Supplementary Table 2: Oligonucleotide primers**

| Target gene (template)                                                 | Primers                                                        | Ref.      |
|------------------------------------------------------------------------|----------------------------------------------------------------|-----------|
| <i>samR0484</i>                                                        | pOSV_samR0484_FW:<br>5'-AAAGGGAAGCTTAGGAGGCCAGTCATTGCTGGTCC-3' | This work |
| (for cloning into pOSV556t<br>between <i>HindIII</i> and <i>Clal</i> ) | pOSV_samR0484_RV:<br>5'-CCCTTTATCGATCGTGGGCAGGCTCTGCTC-3'      |           |
| <i>samR0483</i>                                                        | pOSV_samR0483_FW:<br>5'-AAGGGAAGCTTGCTGGTATGTCGTCCCA-3'        | This work |
| (for cloning into pOSV556t<br>between <i>HindIII</i> and <i>Clal</i> ) | pOSV_samR0483_RV:<br>5'-CCCTTTATCGATACGACGTCACA-3'             |           |
| <i>samR0483</i>                                                        | 0483_BamHI:<br>5'-CGCGGATCCATGTCGCTCCAGGA-3'                   | This work |
| (pOSV556t- <i>samR0483</i> )                                           | 0483_HindIII:<br>5'-GGGAAGCTTTCACAGGGGAATGT-3'                 |           |
| <i>samR0483</i>                                                        | TOPO_483_FW:<br>5'-CACCATGTCGCTCCAGGAGCCTGTCTC-3'              | This work |
| (For TOPO cloning into<br>pET151)                                      | TOPO_483_R:<br>5'-TCACAGGGGAATGTTCCCGTGTT-3'                   |           |
| <i>samR0483</i> in <i>pET151</i>                                       | pET28a-samR0483_FW:<br>5'-ATGCGCGCTAGCGATTCTACGGAAAAC-3'       | This work |
| (For cloning into pET28a<br>between <i>NheI</i> and <i>NotI</i> )      | pET28a-samR0483_RV:<br>5'-TATATAGCGGCCGCTCACAGGGGAATGTT-3'     |           |



**Supplementary Table 3:** Comparison of  $^1\text{H}$  and  $^{13}\text{C}$  NMR data for stambomycin D<sup>1</sup> (**4**) and stambomycin analogue **22**. The atom numbering is shown in Figure 3 of the main manuscript.

| Position            | $\delta_{\text{C}}$ (ppm) in <b>4</b> | $\delta_{\text{C}}$ (ppm) in <b>22</b> | $\delta_{\text{H}}$ (ppm) in <b>4</b> | $\delta_{\text{H}}$ (ppm) in <b>22</b> | $J_{\text{H-H}}$ (Hz) |
|---------------------|---------------------------------------|----------------------------------------|---------------------------------------|----------------------------------------|-----------------------|
| 1                   | 173.3                                 | 173.1                                  | -                                     | -                                      |                       |
| 2                   | 44.3                                  | 44.3                                   | 2.52, 2.83                            | 2.53, 2.76                             | 14.5                  |
| 3                   | 100.0                                 | 100.1                                  | -                                     | -                                      |                       |
| 4                   | 46.2                                  | 46.2                                   | 1.56                                  | 1.57                                   |                       |
| 4-Me                | 12.4                                  | 12.5                                   | 1.04                                  | 1.11                                   |                       |
| 5                   | 81.0                                  | 81.0                                   | 3.66                                  | 3.66                                   |                       |
| 1'                  | 104.6                                 | 105.8                                  | 4.44                                  | 4.44                                   | 7.0                   |
| 2'                  | 70.0                                  | 69.8                                   | 3.54                                  | 3.54                                   | 7.5, 10.5             |
| 3'                  | 72.0                                  | 72.0                                   | 3.23                                  | 3.23                                   | 10.5                  |
| 4'                  | 70.8                                  | 70.5                                   | 3.38                                  | 3.39                                   | 10.0                  |
| 5'                  | 74.0                                  | 74.0                                   | 3.42                                  | 3.42                                   | 6.0, 9.0              |
| 6'                  | 18.1                                  | 17.8                                   | 1.29                                  | 1.29                                   |                       |
| 3'-NMe <sub>2</sub> | 42.2                                  | 42.3                                   | 3.03                                  | 3.00                                   |                       |
| 6                   | 39.1                                  | 38.9                                   | 1.61, 1.90                            | 1.91                                   |                       |
| 7                   | 70.0                                  | 69.9                                   | 3.83                                  | 3.83                                   |                       |
| 8                   | 40.8                                  | 41.0                                   | 1.56                                  | 1.58                                   |                       |
| 8-Me                | 9.3                                   | 9.4                                    | 0.93                                  | 0.89                                   |                       |
| 9                   | 79.9                                  | 79.9                                   | 3.90                                  | 3.90                                   | 7.5                   |
| 10                  | 137.1                                 | 136.9                                  | -                                     | -                                      |                       |
| 10-Me               | 12.4                                  | 12.4                                   | 1.65                                  | 1.65                                   |                       |
| 11                  | 128.0                                 | 127.8                                  | 6.06                                  | 6.04                                   | 11.0                  |
| 12                  | 129.9                                 | 129.5                                  | 6.35                                  | 6.36                                   | 11.0, 14.5            |
| 13                  | 131.7                                 | 131.6                                  | 5.81                                  | 5.80                                   |                       |
| 14                  | 39.8                                  | 39.8                                   | 2.34                                  | 2.34                                   | 6.5                   |
| 15                  | 75.8                                  | 75.7                                   | 3.77                                  | 3.78                                   |                       |
| 16                  | 42.6                                  | 42.9                                   | 1.52                                  | 1.52                                   |                       |
| 16-Me               | 7.4                                   | 7.4                                    | 0.95                                  | 0.96                                   |                       |
| 17                  | 75.5                                  | 75.5                                   | 3.72                                  | 3.72                                   |                       |
| 18                  | 36.1                                  | 36.1                                   | 1.48                                  | 1.47                                   |                       |
| 19                  | 23.5                                  | 23.3                                   | 1.32, 1.34                            | 1.32                                   |                       |
| 20                  | 38.5                                  | 38.5                                   | 1.47                                  | 1.45                                   |                       |
| 21                  | 71.1                                  | 70.9                                   | 3.55                                  | 3.55                                   |                       |
| 22                  | 43.1                                  | 43.0                                   | 1.61, 1.67                            | 1.61, 1.68                             |                       |
| 23                  | 77.5                                  | 77.4                                   | 4.23                                  | 4.23                                   | 7.0                   |
| 24                  | 139.4                                 | 138.5                                  | -                                     | -                                      |                       |
| 24-Me               | 12.2                                  | 12.4                                   | 1.64                                  | 1.64                                   |                       |
| 25                  | 129.3                                 | 129.9                                  | 5.23                                  | 5.21                                   | 10.5                  |

|       |       |       |            |            |           |
|-------|-------|-------|------------|------------|-----------|
| 26    | 41.9  | 41.8  | 2.45       | 2.44       |           |
| 1"    | 32.4  | 32.4  | 1.18, 1.79 | 1.19, 1.81 | 7.0       |
| 2"    | 26.6  | 30.6  | 1.37       | 1.38       |           |
| 3"    | 35.8  | 34.9  | 1.31, 1.44 | 1.29       |           |
| 4"    | 34.0  | 33.0  | 1.43, 1.49 | 1.28       |           |
| 5"    | 29.2  | 14.4  | 1.29       | 0.88       |           |
| 6"    | 11.5  | -     | 0.87       | -          |           |
| 27    | 79.7  | 79.6  | 3.36       | 3.36       |           |
| 28    | 74.2  | 74.0  | 3.47       | 3.47       |           |
| 29    | 27.8  | 27.8  | 1.43, 1.68 | 1.42, 1.66 |           |
| 30    | 36.1  | 36.0  | 1.43, 1.70 | 1.69       |           |
| 31    | 70.1  | 69.9  | 3.83       | 3.83       |           |
| 32    | 46.4  | 46.2  | 1.50, 1.57 | 1.51, 1.57 |           |
| 33    | 66.8  | 66.7  | 4.06       | 4.07       |           |
| 34    | 42.0  | 41.8  | 1.48, 1.50 | 1.49, 1.50 |           |
| 35    | 72.9  | 72.8  | 3.74       | 3.74       |           |
| 36    | 40.8  | 40.6  | 1.48       | 1.47       |           |
| 36-Me | 15.6  | 15.6  | 0.92       | 0.93       |           |
| 37    | 29.8  | 29.6  | 1.28, 1.12 | 1.12, 1.56 |           |
| 38    | 36.0  | 36.0  | 1.50       | 1.49       |           |
| 39    | 76.3  | 76.3  | 3.72       | 3.72       |           |
| 40    | 42.3  | 42.3  | 1.51       | 1.51       |           |
| 40-Me | 7.0   | 6.9   | 0.91       | 0.92       |           |
| 41    | 75.9  | 75.9  | 3.71       | 3.71       |           |
| 42    | 33.8  | 33.6  | 1.43, 1.62 | 1.43, 1.62 |           |
| 43    | 22.9  | 22.9  | 1.43       | 1.45       |           |
| 44    | 38.8  | 38.9  | 1.45, 1.46 | 1.45, 1.46 |           |
| 45    | 70.6  | 70.5  | 3.67       | 3.67       |           |
| 46    | 44.8  | 44.9  | 1.60, 1.65 | 1.60       |           |
| 47    | 71.1  | 71.0  | 4.28       | 4.27       | 6.5, 13.0 |
| 48    | 136.7 | 136.8 | 5.80       | 5.77       | 5.0, 10.5 |
| 49    | 130.8 | 130.9 | 5.72       | 5.73       | 6.0, 15.5 |
| 50    | 72.8  | 72.8  | 5.43       | 5.42       | 6.0       |
| 51    | 20.8  | 20.8  | 1.33       | 1.35       |           |

**Supplementary Table 4:** Crystallographic statistics

|                                                     | <b>apo-Mccb</b>                               | <b>Mccb + 1 Hex-CoA</b>                       | <b>Mccb + 4 Hex-CoA</b>                       |
|-----------------------------------------------------|-----------------------------------------------|-----------------------------------------------|-----------------------------------------------|
|                                                     | <b>5ING</b>                                   | <b>5INF</b>                                   | <b>5INI</b>                                   |
| <b>Data collection</b>                              | ALS BL821                                     | ALS BL822                                     | ALS BL821                                     |
| Wavelength (Å)                                      | 0.9999                                        | 0.9998                                        | 1.000                                         |
| Space group                                         | P2 <sub>1</sub> 2 <sub>1</sub> 2 <sub>1</sub> | P2 <sub>1</sub> 2 <sub>1</sub> 2 <sub>1</sub> | P2 <sub>1</sub> 2 <sub>1</sub> 2 <sub>1</sub> |
| Cell dimensions                                     |                                               |                                               |                                               |
| <i>a</i> , <i>b</i> , <i>c</i> (Å)                  | 120.56, 163.44,<br>186.55                     | 110.072 165.453                               | 110.978,161.526,<br>187.294                   |
| $\alpha$ , $\beta$ , $\gamma$ (°)                   | 90, 90, 90                                    | 90, 90, 90                                    | 90, 90, 90                                    |
| Resolution (Å)                                      | 58.12 - 2.45                                  | 42.22 - 2.75                                  | 48.44 - 2.85                                  |
| <i>R</i> <sub>merge</sub>                           | 0.112 (0.966)                                 | 0.208 (0.837)                                 | 0.206 (0.731)                                 |
| <i>I</i> / $\sigma$ <i>I</i>                        | 11.8 (1.6)                                    | 14.4 (3.5)                                    | 10 (3.6)                                      |
| Completeness (%)                                    | 99 (97.3)                                     | 100 (99.9)                                    | 100 (99.4)                                    |
| Multiplicity                                        | 6.1 (5.4)                                     | 7.4 (7.3)                                     | 6.9 (6.7)                                     |
| <i>CC</i> (1/2)                                     | (0.662)                                       | (0.796)                                       | (0.820)                                       |
| <b>Refinement</b>                                   |                                               |                                               |                                               |
| Resolution (Å)                                      | 58.12 - 2.45                                  | 42.22 - 2.75                                  | 48.44 - 2.85                                  |
| No. reflections                                     | 133794 (12965)                                | 90300 (8650)                                  | 79173 (7792)                                  |
| <i>R</i> <sub>work</sub> / <i>R</i> <sub>free</sub> | 0.195/0.223                                   | 0.184/0.242                                   | 0.173/0.230                                   |
| No. atoms                                           |                                               |                                               |                                               |
| Protein                                             | 22424                                         | 21976                                         | 22284                                         |
| Ligand/ion                                          | N/A                                           | 55                                            | 220                                           |
| Water                                               | 956                                           | 1091                                          | 392                                           |
| B-factors                                           |                                               |                                               |                                               |
| Protein                                             | 48.57                                         | 27.71                                         | 24.59                                         |
| Ligand/ion                                          | N/A                                           | 52.88                                         | 54.39                                         |
| Water                                               | 47.12                                         | 26.09                                         | 20.27                                         |
| R.M.S deviations                                    |                                               |                                               |                                               |
| Bond lengths (Å)                                    | 0.007                                         | 0.013                                         | 0.007                                         |
| Bond angles (°)                                     | 1.07                                          | 1.17                                          | 0.90                                          |

All structures were determined from a single crystal

\*Highest resolution shell is shown in parenthesis.

## Supplementary References

1. Quade, N., Huo, L., Rachid, A. Heinz, D.W. & Müller, R. Unusual carbon fixation gives rise to diverse polyketide extender units. *Nat. Chem. Biol.* **8**, 117-124 (2012)
2. Peter, D.M. *et al.* Screening and engineering the synthetic potential of carboxylating reductases from central metabolism and polyketide biosynthesis. *Angew. Chem., Int. Ed.* **54**, 13457-13461 (2015)
3. Zhang, L. *et al.* Rational control of polyketide extender units by structure-based engineering of crotonyl-CoA carboxylase/reductase in antimycin biosynthesis. *Angew. Chem., Int. Ed.* **54**, 13463-13465 (2015)
4. Laureti, L. *et al.* Identification of a bioactive 51-membered macrolide complex by activation of a silent polyketide synthase in *Streptomyces ambofaciens*. *Proc. Natl. Acad. Sci. U. S. A.* **108**, 6258-6263 (2011)
5. Kieser, T., Bibb, M. J., Buttner, M. J. Chater, K. F. & Hopwood, D. A. *Practical Streptomyces Genetics*, John Innes Foundation, Norwich (2000).
6. Osada, H., Koshino, H., Isono, K., Takahashi, H. & Kawanishi, G. Reveromycin A, a new antibiotic which inhibits the mitogenic activity of epidermal growth factor. *J. Antibiot. (Tokyo)* **44**, 259-261 (1991)
7. Komatsu, M., Uchiyama, T., Omura, S., Cane, D. E. & Ikeda, H. Genome-minimized *Streptomyces* host for the heterologous expression of secondary metabolism. *Proc. Natl. Acad. Sci. U. S. A.* **107**, 2646-2651 (2010)
8. Miyazawa, T *et al.* Identification of middle chain fatty acyl-CoA ligase responsible for the biosynthesis of 2-alkylmalonyl-CoAs for polyketide extender unit. *J. Biol. Chem.* **290**, 26994-27011 (2015)
9. Kindly provided by Dr Jean-Luc, Pernodet, Université Paris-Sud 11, Orsay, France.
10. Onaka, H., Taniguchi, S., Ikeda, H., Igarashi, Y. & Furumai, T. pTOYAMAcos, pTYM18, and pTYM19, actinomycete-*Escherichia coli* integrating vectors for heterologous gene expression. *J. Antibiot. (Tokyo)* **56**, 950-956 (2003)
11. Takahashi, S. *et al.* Biochemical characterization of a novel indole prenyltransferase from *Streptomyces* sp. SN-593. *J. Bacteriol.* **192**, 2839-2851 (2010)
12. Hong, H., Samborsky, M., Lindner, F. & Leadlay, P.F. An amidinohydrolase provides the missing link in the biosynthesis of amino marginolactone antibiotics. *Angew. Chem., Int. Ed.* **55**, 1118-1123 (2016)
